# Supplementary material for: The CSY-protecting group in the microwave-assisted synthesis of aggregation-prone peptides
Source: Royal Society of Chemistry journal article supplement (doi:10.1039/d1cb00252j), 2022-01-01
Supplement: d1cb00252j1.pdf [file d1cb00252j1.pdf]

**Electronic Supporting Information**

**The CSY-protecting group in the microwave-assisted  
synthesis of aggregation-prone peptides**

Truc Lam Pham,<sup>a,b</sup> Jennifer Zilke,<sup>a,b</sup> Christine Charlotte Müller<sup>c</sup> and  
Franziska Thomas<sup>\*a,b</sup>

<sup>a</sup>Institute of Organic Chemistry, Heidelberg University, Im Neuenheimer Feld 270,  
69120 Heidelberg, Germany

<sup>b</sup>Centre for Advanced Materials, Heidelberg University, Im Neuenheimer Feld 225,  
69120 Heidelberg, Germany

<sup>c</sup>Institute of Inorganic Chemistry, RWTH Aachen University, Landoltweg 1a, 52074  
Aachen, Germany

\*Correspondence:  
franziska.thomas@oci.uni-heidelberg.de

## Table of Contents

|      |                                                                      |     |
|------|----------------------------------------------------------------------|-----|
| 1    | Supplementary figures .....                                          | S1  |
| 2    | Experimental procedures .....                                        | S6  |
| 2.1  | Reagents and solvents .....                                          | S6  |
| 2.2  | Software for data analysis and visualization .....                   | S6  |
| 2.3  | Peptide synthesis and purification .....                             | S6  |
| 2.4  | Screening for optimal Fmoc-deprotection and coupling conditions..... | S16 |
| 2.5  | CD Spectroscopy.....                                                 | S16 |
| 2.6  | NMR spectroscopy .....                                               | S17 |
| 2.7  | IR-Spectroscopy .....                                                | S17 |
| 2.8  | Mass spectrometry .....                                              | S17 |
| 2.9  | Melting point determination .....                                    | S17 |
| 2.10 | Deprotection of CSY .....                                            | S18 |
| 2.11 | CSY Deprotection of Fmoc-Asp(CSY)-OH.....                            | S19 |
| 3    | Organic Synthesis .....                                              | S20 |
| 3.1  | Synthesis of Fmoc-Asp(CSY)-OtBu .....                                | S20 |
| 3.2  | Synthesis of Fmoc-Asp(CSY)-OH .....                                  | S21 |
| 4    | Calculation of the cost of the synthesis of Fmoc-Asp(CSY)-OH.....    | S22 |
| 5    | Characterization of peptides .....                                   | S23 |
| 5.1  | Peptide 1(CSY).....                                                  | S23 |
| 5.2  | Peptide 1.....                                                       | S23 |
| 5.3  | Peptide 2(CSY).....                                                  | S24 |
| 5.4  | Peptide 2.....                                                       | S24 |
| 5.5  | Peptide 3(CSY).....                                                  | S25 |
| 5.6  | Peptide 3.....                                                       | S25 |
| 6    | Additional Spectra .....                                             | S27 |
| 6.1  | NMR.....                                                             | S27 |
| 6.2  | FT-IR.....                                                           | S31 |
| 6.3  | ESI-MS .....                                                         | S32 |
| 7    | Abbreviation .....                                                   | S34 |
| 8    | Literature .....                                                     | S34 |

## 1 Supplementary figures

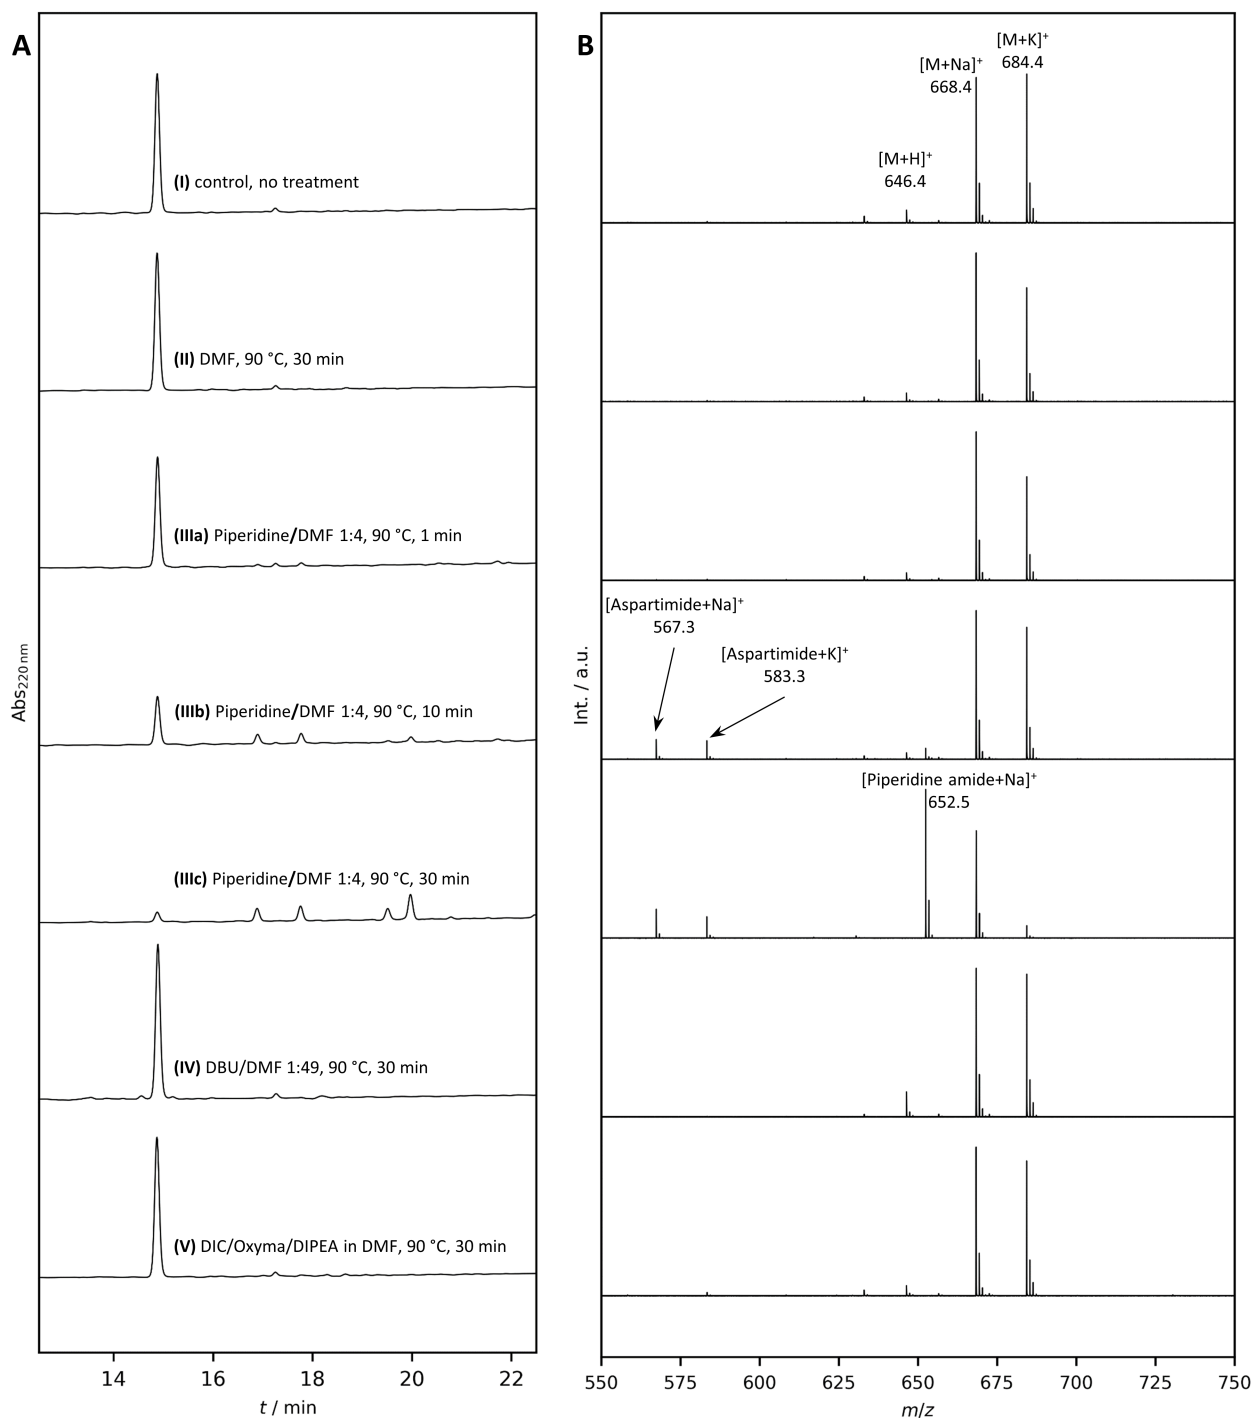

Figure S1. Treatment of resin-bound test peptide **4** under the different conditions of microwave-assisted solid-phase peptide synthesis. A: HPLC traces of crude peptide mixtures after acidic cleavage from the resin. B: MALDI-TOF-MS of crude peptide mixtures after acidic cleavage from the resin.

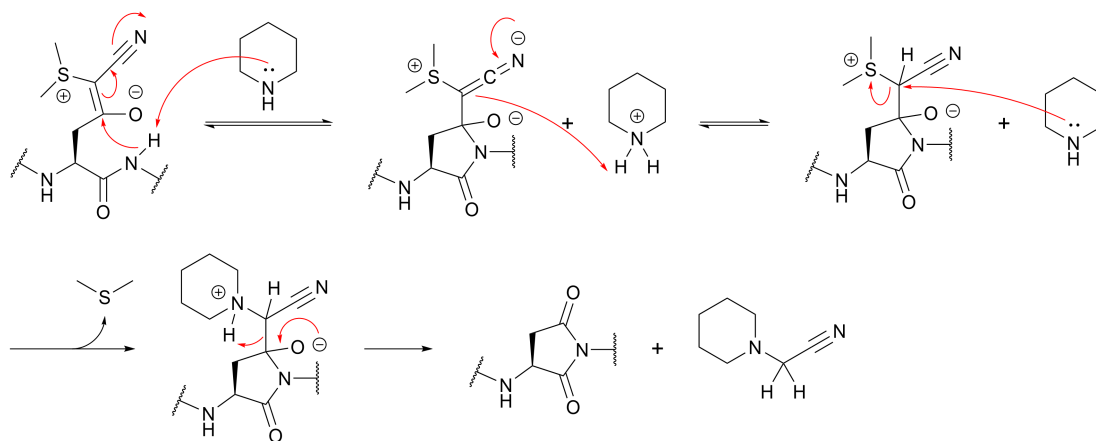

Figure S2. Postulated mechanism of the nucleophilic CSY cleavage with piperidine under microwave heating based on the observations from Figure S1.

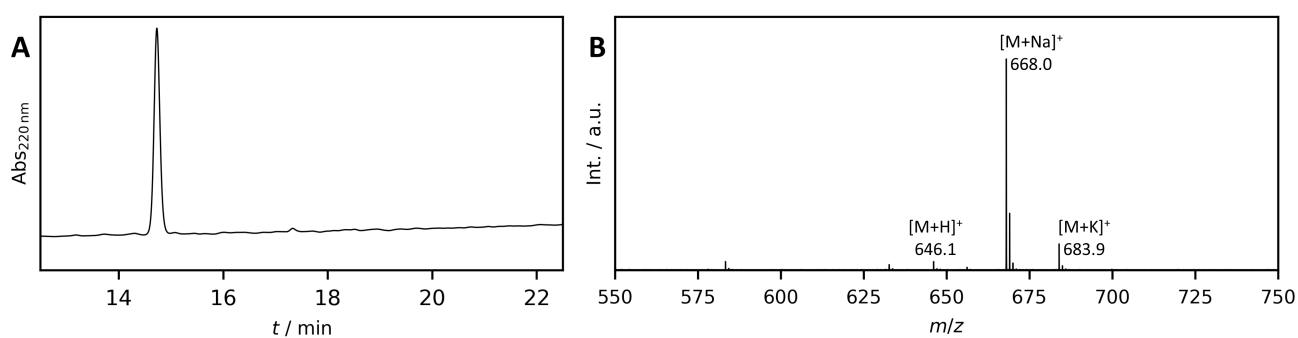

Figure S3. New microwave-assisted SPPS of test peptide **4** using the optimized synthesis protocol. A: HPLC trace of crude **4**. B: MALDI-TOF-MS of crude **4**.



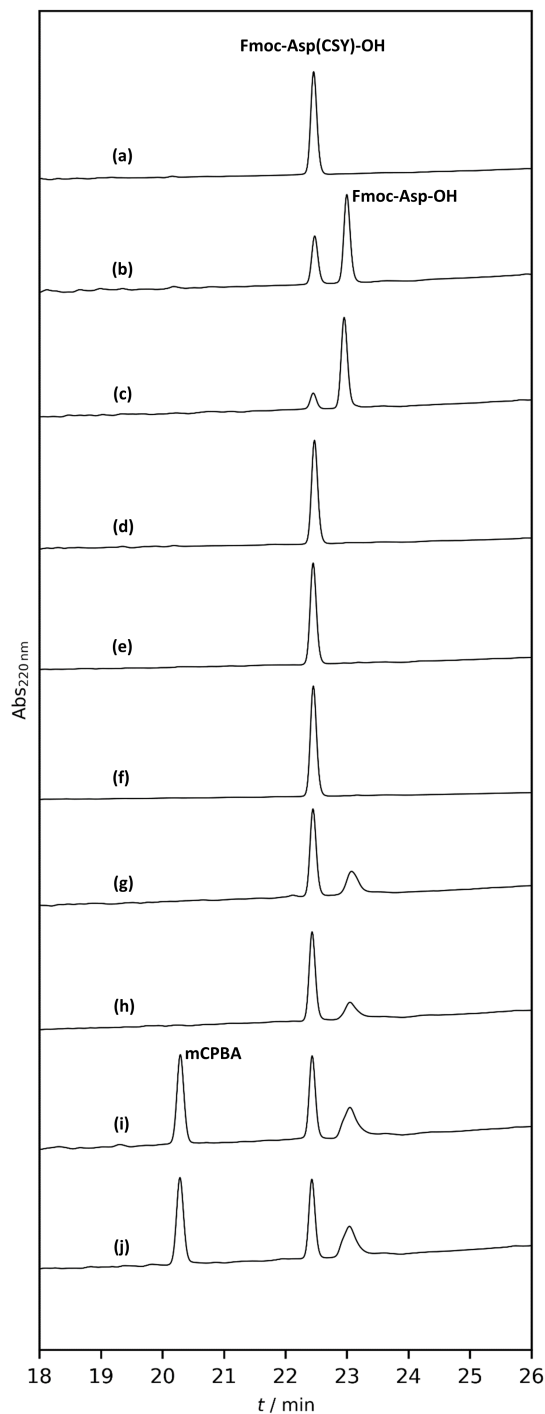

Figure S4. Screening of different cleavage conditions for the CSY protecting group from Fmoc-Asp(CSY)-OH with different oxidants (2.0 eq.). Conditions: a) Reference. b) NCS, MeCN + 0.1% TFA, water + 0.1% TFA. c) NCS, MeCN, acetate buffer pH 4.5. d) Iodine, MeCN + 0.1% TFA, water + 0.1% TFA. e) Iodine, MeCN, phosphate buffer pH 10.0. f) NaIO<sub>4</sub>, MeCN, acetate buffer pH 4.5. g) Oxone, MeCN, water. h) Oxone, MeCN + 0.1% TFA, water + 0.1% TFA. i) mCPBA, MeCN, water. j) mCPBA, MeCN + 0.1% TFA, water + 0.1% TFA.

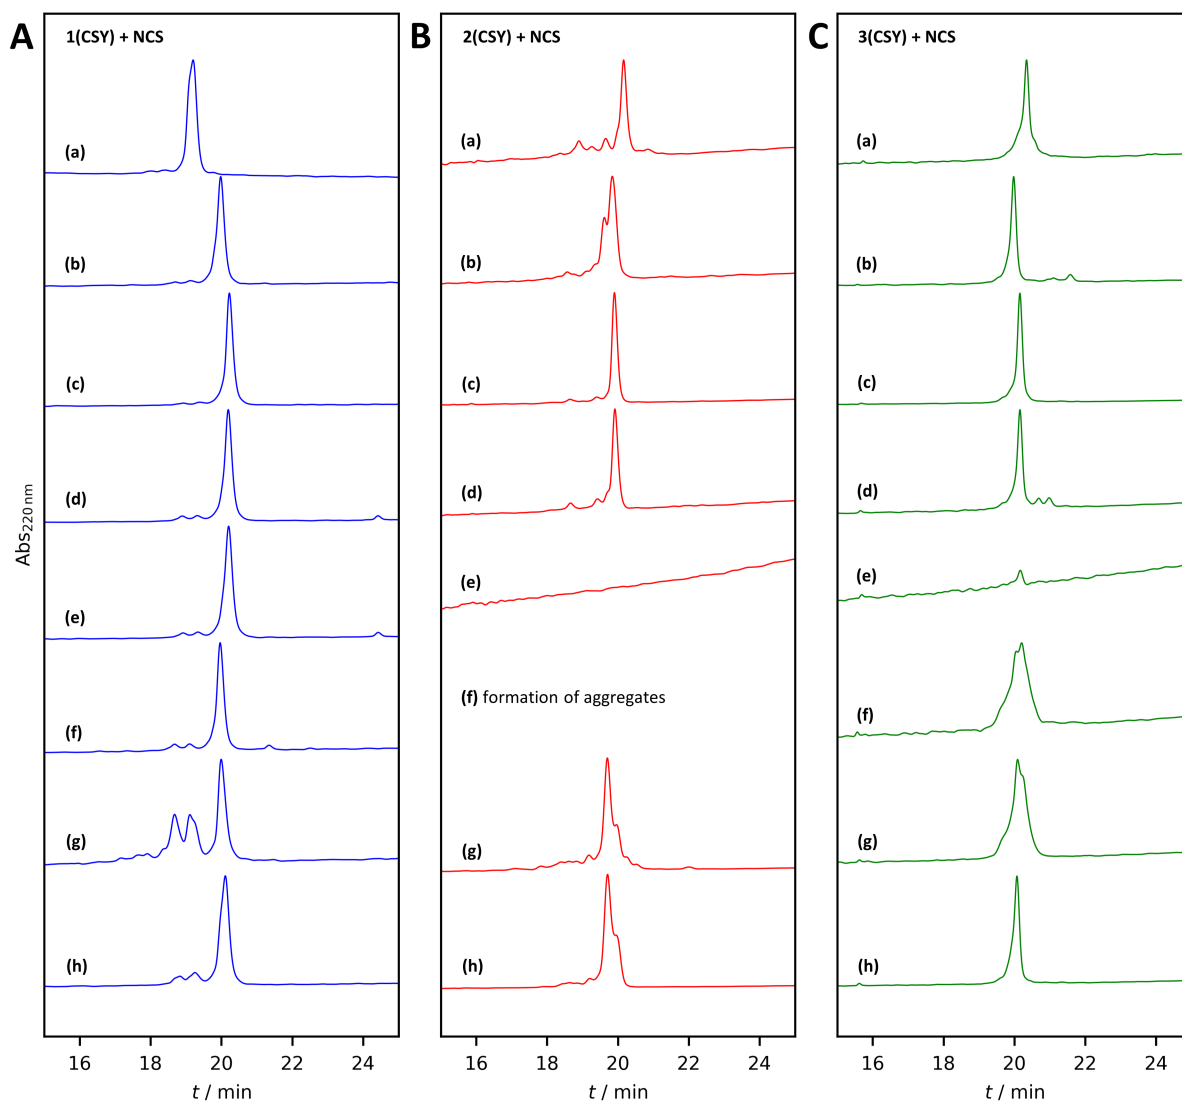

Figure S5. Screening of different cleavage conditions for the CSY protecting group from peptides **1**, **2**, and **3** with NCS (2.2 eq. regarding amount of CSY). Conditions: a) MeCN, acetate buffer pH 4.5 (conditions from Neumann *et al.*).<sup>1</sup> b) HFIP, MeCN + 0.1% TFA, water + 0.1% TFA. c) DMF, HFIP, water + 0.1% TFA. d) DMF, HFIP, TFE, water + 0.1% TFA. e) HFIP, TFE, MeCN + 0.1% TFA, water + 0.1% TFA. f) MeOH + 0.1% TFA, water + 0.1% TFA. g) GdnHCl, MeCN + 0.1% TFA, water + 0.1% TFA. h) GdnHCl, TFE, MeCN + 0.1% TFA, water + 0.1% TFA.

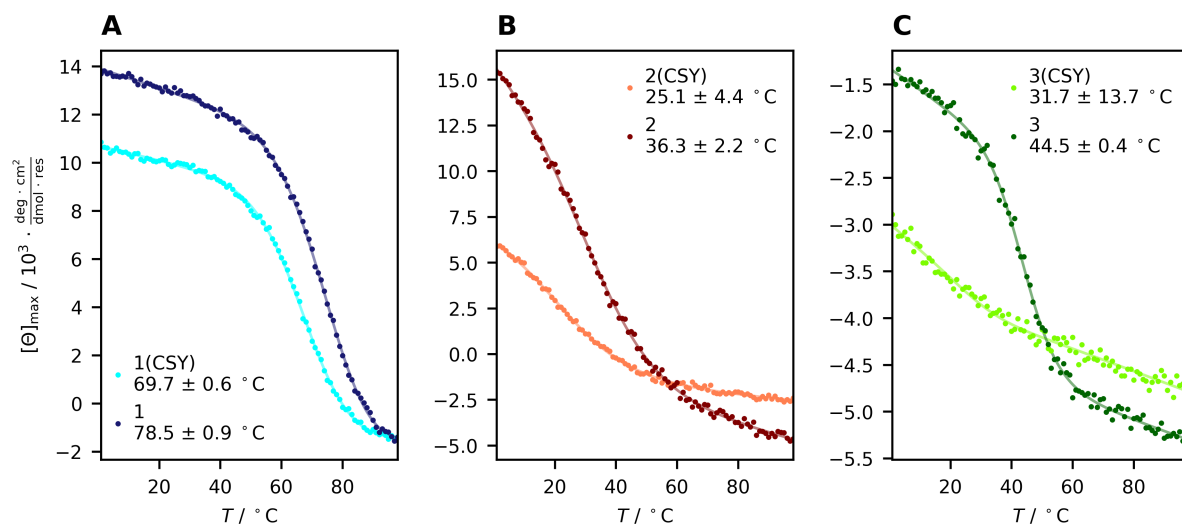

Figure S6. CD thermal denaturation profiles of CSY-protected and fully unprotected peptides **1**, **2** and **3**.

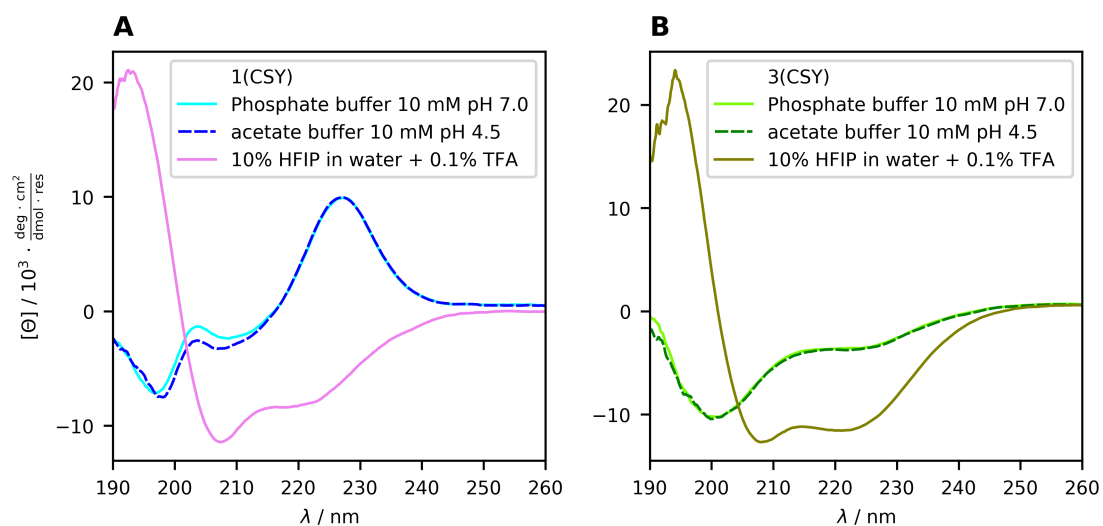

Figure S7. CD spectra of peptides **1**(CSY) and **3**(CSY) in different buffers.

## 2 Experimental procedures

### 2.1 Reagents and solvents

Standard Fmoc-protected amino acids and *N,N*-diisopropylcarbodiimide (DIC) were acquired from *Iris Biotech GmbH* (Marktredwitz, Germany). Fmoc-Nle-OH was purchased from *Carbolution Chemicals GmbH* (St. Ingebert, Germany). Oxyma®, *N,N*-diisopropylamine (DIPEA), piperidine, H-Gly-HMPB-ChemMatrix® resin, H-Rink amide ChemMatrix® resin, MeCN (HPLC grade), trifluoroacetic acid (TFA, HPLC grade) and triisopropylsilane (TIPS) were acquired from *Merck KGaA* (Darmstadt, Germany). DMF (peptide synthesis grade) was purchased from *Fisher Scientific* (Loughborough, United Kingdom). All other solvents and reagents were at least *pro analysis* grade quality and were acquired from *Carbolution Chemicals GmbH* (St. Ingebert, Germany), *Carl Roth GmbH + Co. KG* (Karlsruhe, Germany), *Fisher Scientific* (Loughborough, United Kingdom), *Grüssing GmbH* (Filsum, Germany), *Honeywell* (Seelze, Germany), *Merck KGaA* (Darmstadt, Germany), *neoFroxx GmbH* (Einhausen, Germany), *SERVA Electrophoresis GmbH* (Heidelberg, Germany), *Th. Geyer GmbH & Co. KG* (Renningen, Germany) and *VWR International* (Fontenay-sous-Bois, France). Reagents and solvents were used as received. Water was purified with a *Sartorius arium® mini* lab water system and degassed by flushing with N<sub>2</sub>-gas for 10 min.

### 2.2 Software for data analysis and visualization

Data were analysed with *Anaconda 5.0.1 (Python 2.7)*, *OriginPro® 9.8.0.200* and *Microsoft Excel 2016* if not stated otherwise.

### 2.3 Peptide synthesis and purification

#### 2.3.1 Solid-phase peptide synthesis and peptide isolation

Peptides were synthesized on a microwave-assisted peptide synthesizer (*CEM Liberty Blue*, see below for detailed settings). Preloaded H-Gly-HMPB ChemMatrix® resin or H-Rink-Amide ChemMatrix® resin was used as solid support. A loading density of 0.5 mmol/g was assumed for the synthesis. Prior to synthesis, the resin was swollen in DMF for at least 10 min. Fmoc protected amino acids were used as 0.2 M solution in DMF. Diisopropyl carbodiimide (DIC) dissolved in DMF (0.5 M) was used as activator, and Oxyma® solution in DMF (1.0 M) plus 0.1 M DIPEA was used as the activator base. A solution of piperidine/DMF 1:4 v/v was used to remove the Fmoc protecting group. For *N*-terminal acetylation the peptide resin was treated with acetic anhydride (0.5 mL) in DMF (4.5 mL) for 10 min, then washed with DMF (3 x 5 mL), MeOH (3 x 5 mL) and DCM (6 x 5 mL) and finally dried under reduced pressure. Cleavage of the peptide from the resin and final deprotection were carried out in trifluoroacetic acid (TFA) containing triisopropylsilane (TIPS) and water (detailed composition is described in chapter 2.3.5). After equilibration at rt for 4 h, the resin was filtered off and washed with TFA (2 x 5 mL). The TFA was removed in a stream of nitrogen and the peptide was precipitated from ice-cold Et<sub>2</sub>O (25 mL). The peptide was isolated by centrifugation. The pellet was washed with Et<sub>2</sub>O (2 x 25 mL) and dissolved in acetonitrile/water 1:4 v/v + 0.1% TFA (15 mL), filtered with a syringe filter (*MACHEREY-NAGEL CHROMAFIL® RC-45/15 MS*), and lyophilized (*Christ Alpha 2-4-LDplus* connected to a *VACUUBRAND RZ 6* pump).

#### 2.3.2 High-performance liquid chromatography (HPLC)

The peptides were purified by reversed-phase HPLC on a *MACHEREY-NAGEL NUCLEODUR® C18ec* column (250 mm x 10 mm, 100 Å, 5 µm) at a flow rate of 3 mL/min at 50 °C. A *Jasco* chromatography system with a *PU-4180* pump, a *CO-4060* column thermostat and a *UV-4070* detector was used. Analytical HPLC was performed using a *Hitachi Primaide* chromatography system containing a *1110 Pump*, a *1210 auto sampler*, *1310 column oven* and a *1430 diode array detector*. A *VDS optilab VDSpher® PUR 100 C18-SE* (250 mm x 4.6 mm, 100 Å, 5 µm) column and a flow rate of 1 mL/min at 50 °C were used. Preparative chromatograms were monitored at 220 nm and 280 nm. Analytical chromatograms were monitored from 190 to 400 nm. Fractions containing pure peptide were identified by analytical HPLC and MALDI-TOF MS, pooled and lyophilized. As solvent system, water + 0.1% TFA (buffer A) and MeCN + 0.1% TFA (buffer B) was used. The gradients are described in Table S1.

Table S1: Gradients used for the purification and characterization of peptides **1** to **4** and Fmoc-Asp(CSY)-OH. The percentages of buffer B in buffer A (v/v) are given.

| preparative             | Isocratic 1 | linear gradient | Isocratic 2 | Isocratic 3 |
|-------------------------|-------------|-----------------|-------------|-------------|
| time / min              | 0 → 8       | 8 → 38          | 39 → 44     | 45 → 50     |
| <b>1</b>                | 20%         | 20 – 40%        | 100%        | 20%         |
| <b>2</b>                | 30%         | 30 – 70%        | 100%        | 30%         |
| <b>3 and 4</b>          | 20%         | 20 – 70%        | 100%        | 20%         |
| analytical              |             |                 |             |             |
| time / min              | 0 → 5       | 5 → 35          | 36 → 41     | 42 → 50     |
| <b>1</b>                | 20%         | 20 – 40%        | 95%         | 20%         |
| <b>2</b>                | 30%         | 30 – 70%        | 95%         | 30%         |
| <b>3 and 4</b>          | 20%         | 20 – 70%        | 95%         | 20%         |
| <b>Fmoc-Asp(CSY)-OH</b> | 20%         | 20 – 80%        | 95%         | 20%         |

### 2.3.3 Concentration determination

The peptides were dissolved in water and the concentration was determined by measuring the absorbance at 280 nm ( $\epsilon_{280}$  [M<sup>-1</sup> cm<sup>-1</sup>]: **1**: 13980, **2**: 20970, **3**: 15470), calculated from the weighted sum of the extinction coefficients of Trp (5500 M<sup>-1</sup> cm<sup>-1</sup>) and Tyr (1490 M<sup>-1</sup> cm<sup>-1</sup>).<sup>2</sup> For the measurements an *Implen NP80* spectrophotometer was used. For peptides containing CSY the amount was determined by weighing.

### 2.3.4 Settings of the peptide synthesizer

The following Tables (S2-S20) contain the detailed settings for the microwave-assisted peptide syntheses performed in this study using the *CEM LibertyBlue* peptide synthesizer.

Table S2: Settings for Microwave Methods. Mixing of the reaction mixture was performed by bubbling nitrogen through the reaction vessel frit (bubble for 2 s, off for 3 s).

| Microwave Method          | Temperature / °C | Power / W | Hold Time / s | DeltaT / °C |
|---------------------------|------------------|-----------|---------------|-------------|
| Standard deprotection     | 75               | 155       | 15            | 2           |
|                           | 90               | 30        | 50            | 1           |
| Conventional deprotection | 25               | 0         | 300           | 2           |
| Standard coupling         | 75               | 170       | 15            | 2           |
|                           | 90               | 30        | 110           | 1           |
| Conventional coupling     | 25               | 0         | 3600          | 2           |
| 50 °C 10 min Coupling     | 25               | 0         | 120           | 2           |
|                           | 50               | 35        | 480           | 1           |

Table S3: Settings for **Resin Swelling**.

| Cycle Steps   | Parameter values                        |
|---------------|-----------------------------------------|
| 1 Swell Resin | Main solvent volume: 15 mL, Time: 300 s |

Table S4: Settings for **First Single Coupling**.

| Cycle Steps    | Parameter values                                                                                                                                                                                                                                                                                                                                               |
|----------------|----------------------------------------------------------------------------------------------------------------------------------------------------------------------------------------------------------------------------------------------------------------------------------------------------------------------------------------------------------------|
| 1 Deprotection | Reaction Method: Standard Deprotection, Deprotection Volume: 4 mL                                                                                                                                                                                                                                                                                              |
| 2 Deprotection | Reaction Method: Standard Deprotection, Deprotection Volume: 4 mL                                                                                                                                                                                                                                                                                              |
| 3 Wash         | Volume: 4 mL, Drain Time: 10 s                                                                                                                                                                                                                                                                                                                                 |
| 4 Wash         | Volume: 4 mL, Drain Time: 5 s                                                                                                                                                                                                                                                                                                                                  |
| 5 Wash         | Volume: 4 mL, Drain Time: 5 s                                                                                                                                                                                                                                                                                                                                  |
| 6 Wash         | Volume: 4 mL, Drain Time: 5 s                                                                                                                                                                                                                                                                                                                                  |
| 7 Coupling     | Reaction Method: Standard coupling, Amino Acid: from method, Amino Acid Volume: 2.5 mL, Activator Bottle Position: PositionACT, Activator Volume: 2 mL, Activator Base Position: PositionACTB, Activator Base Volume: 1 mL, Delayed Reagent Time: 0 s, Delayed Reagent Bottle Position: PositionACTB, Delayed Reagent Volume: 0 mL, Manifold Wash Volume: 2 mL |
| 8 Wash         | Volume: 4 mL, Drain Time: 10 s                                                                                                                                                                                                                                                                                                                                 |
| 9 Wash         | Volume: 4 mL, Drain Time: 5 s                                                                                                                                                                                                                                                                                                                                  |

Table S5: Settings for **Single Coupling**.

| Cycle Steps |              | Parameter values                                                                                                                                                                                                                                                                                                                                               |
|-------------|--------------|----------------------------------------------------------------------------------------------------------------------------------------------------------------------------------------------------------------------------------------------------------------------------------------------------------------------------------------------------------------|
| 1           | Deprotection | Reaction Method: Standard Deprotection, Deprotection Volume: 4 mL                                                                                                                                                                                                                                                                                              |
| 2           | Wash         | Volume: 4 mL, Drain Time: 10 s                                                                                                                                                                                                                                                                                                                                 |
| 3           | Wash         | Volume: 4 mL, Drain Time: 5 s                                                                                                                                                                                                                                                                                                                                  |
| 4           | Wash         | Volume: 4 mL, Drain Time: 5 s                                                                                                                                                                                                                                                                                                                                  |
| 5           | Wash         | Volume: 4 mL, Drain Time: 5 s                                                                                                                                                                                                                                                                                                                                  |
| 6           | Coupling     | Reaction Method: Standard coupling, Amino Acid: from method, Amino Acid Volume: 2.5 mL, Activator Bottle Position: PositionACT, Activator Volume: 2 mL, Activator Base Position: PositionACTB, Activator Base Volume: 1 mL, Delayed Reagent Time: 0 s, Delayed Reagent Bottle Position: PositionACTB, Delayed Reagent Volume: 0 mL, Manifold Wash Volume: 2 mL |
| 7           | Wash         | Volume: 4 mL, Drain Time: 10 s                                                                                                                                                                                                                                                                                                                                 |
| 8           | Wash         | Volume: 4 mL, Drain Time: 5 s                                                                                                                                                                                                                                                                                                                                  |

Table S6. Settings for **Single 50 °C 10 min Coupling**.

| Cycle Steps |              | Parameter values                                                                                                                                                                                                                                                                                                                                                   |
|-------------|--------------|--------------------------------------------------------------------------------------------------------------------------------------------------------------------------------------------------------------------------------------------------------------------------------------------------------------------------------------------------------------------|
| 1           | Deprotection | Reaction Method: Standard Deprotection, Deprotection Volume: 4 mL                                                                                                                                                                                                                                                                                                  |
| 2           | Wash         | Volume: 4 mL, Drain Time: 10 s                                                                                                                                                                                                                                                                                                                                     |
| 3           | Wash         | Volume: 4 mL, Drain Time: 5 s                                                                                                                                                                                                                                                                                                                                      |
| 4           | Wash         | Volume: 4 mL, Drain Time: 5 s                                                                                                                                                                                                                                                                                                                                      |
| 5           | Wash         | Volume: 4 mL, Drain Time: 5 s                                                                                                                                                                                                                                                                                                                                      |
| 6           | Coupling     | Reaction Method: 50 °C 10 min coupling, Amino Acid: from method, Amino Acid Volume: 2.5 mL, Activator Bottle Position: PositionACT, Activator Volume: 2 mL, Activator Base Position: PositionACTB, Activator Base Volume: 1 mL, Delayed Reagent Time: 0 s, Delayed Reagent Bottle Position: PositionACTB, Delayed Reagent Volume: 0 mL, Manifold Wash Volume: 2 mL |
| 7           | Wash         | Volume: 4 mL, Drain Time: 10 s                                                                                                                                                                                                                                                                                                                                     |
| 8           | Wash         | Volume: 4 mL, Drain Time: 5 s                                                                                                                                                                                                                                                                                                                                      |

Table S7: Settings for **Single RT Coupling**.

| Cycle Steps |              | Parameter values                                                                                                                                                                                                                                                                                                                                                   |
|-------------|--------------|--------------------------------------------------------------------------------------------------------------------------------------------------------------------------------------------------------------------------------------------------------------------------------------------------------------------------------------------------------------------|
| 1           | Deprotection | Reaction Method: Conventional Deprotection, Deprotection Volume: 4 mL                                                                                                                                                                                                                                                                                              |
| 2           | Deprotection | Reaction Method: Conventional Deprotection, Deprotection Volume: 4 mL                                                                                                                                                                                                                                                                                              |
| 3           | Wash         | Volume: 4 mL, Drain Time: 10 s                                                                                                                                                                                                                                                                                                                                     |
| 4           | Wash         | Volume: 4 mL, Drain Time: 5 s                                                                                                                                                                                                                                                                                                                                      |
| 5           | Wash         | Volume: 4 mL, Drain Time: 5 s                                                                                                                                                                                                                                                                                                                                      |
| 6           | Wash         | Volume: 4 mL, Drain Time: 5 s                                                                                                                                                                                                                                                                                                                                      |
| 7           | Coupling     | Reaction Method: Conventional coupling, Amino Acid: from method, Amino Acid Volume: 2.5 mL, Activator Bottle Position: PositionACT, Activator Volume: 2 mL, Activator Base Position: PositionACTB, Activator Base Volume: 1 mL, Delayed Reagent Time: 0 s, Delayed Reagent Bottle Position: PositionACTB, Delayed Reagent Volume: 0 mL, Manifold Wash Volume: 2 mL |
| 8           | Wash         | Volume: 4 mL, Drain Time: 10 s                                                                                                                                                                                                                                                                                                                                     |
| 9           | Wash         | Volume: 4 mL, Drain Time: 5 s                                                                                                                                                                                                                                                                                                                                      |

Table S8: Settings for **Single Coupling Cool Down**.

| Cycle Steps |              | Parameter values                                                                                                                                                                                                                                                                                                                                               |
|-------------|--------------|----------------------------------------------------------------------------------------------------------------------------------------------------------------------------------------------------------------------------------------------------------------------------------------------------------------------------------------------------------------|
| 1           | Deprotection | Reaction Method: Standard Deprotection, Deprotection Volume: 4 mL                                                                                                                                                                                                                                                                                              |
| 2           | Wash         | Volume: 4 mL, Drain Time: 10 s                                                                                                                                                                                                                                                                                                                                 |
| 3           | Wash         | Volume: 4 mL, Drain Time: 5 s                                                                                                                                                                                                                                                                                                                                  |
| 4           | Wash         | Volume: 4 mL, Drain Time: 5 s                                                                                                                                                                                                                                                                                                                                  |
| 5           | Wash         | Volume: 4 mL, Drain Time: 5 s                                                                                                                                                                                                                                                                                                                                  |
| 6           | Coupling     | Reaction Method: Standard coupling, Amino Acid: from method, Amino Acid Volume: 2.5 mL, Activator Bottle Position: PositionACT, Activator Volume: 2 mL, Activator Base Position: PositionACTB, Activator Base Volume: 1 mL, Delayed Reagent Time: 0 s, Delayed Reagent Bottle Position: PositionACTB, Delayed Reagent Volume: 0 mL, Manifold Wash Volume: 2 mL |
| 7           | Wash         | Volume: 4 mL, Drain Time: 10 s                                                                                                                                                                                                                                                                                                                                 |
| 8           | Wash         | Volume: 4 mL, Drain Time: 10 s                                                                                                                                                                                                                                                                                                                                 |
| 9           | Wash         | Volume: 4 mL, Drain Time: 10 s                                                                                                                                                                                                                                                                                                                                 |
| 10          | Wash         | Volume: 4 mL, Drain Time: 10 s                                                                                                                                                                                                                                                                                                                                 |

Table S9. Settings for **Single Coupling CSY**.

| Cycle Steps |              | Parameter values                                                                                                                                                                                                                                                                                                                                               |
|-------------|--------------|----------------------------------------------------------------------------------------------------------------------------------------------------------------------------------------------------------------------------------------------------------------------------------------------------------------------------------------------------------------|
| 1           | Deprotection | Reaction Method: Conventional Deprotection, Deprotection Volume: 4 mL                                                                                                                                                                                                                                                                                          |
| 2           | Deprotection | Reaction Method: Conventional Deprotection, Deprotection Volume: 4 mL                                                                                                                                                                                                                                                                                          |
| 3           | Wash         | Volume: 4 mL, Drain Time: 10 s                                                                                                                                                                                                                                                                                                                                 |
| 4           | Wash         | Volume: 4 mL, Drain Time: 5 s                                                                                                                                                                                                                                                                                                                                  |
| 5           | Wash         | Volume: 4 mL, Drain Time: 5 s                                                                                                                                                                                                                                                                                                                                  |
| 6           | Wash         | Volume: 4 mL, Drain Time: 5 s                                                                                                                                                                                                                                                                                                                                  |
| 7           | Coupling     | Reaction Method: Standard coupling, Amino Acid: from method, Amino Acid Volume: 2.5 mL, Activator Bottle Position: PositionACT, Activator Volume: 2 mL, Activator Base Position: PositionACTB, Activator Base Volume: 1 mL, Delayed Reagent Time: 0 s, Delayed Reagent Bottle Position: PositionACTB, Delayed Reagent Volume: 0 mL, Manifold Wash Volume: 2 mL |
| 8           | Wash         | Volume: 4 mL, Drain Time: 10 s                                                                                                                                                                                                                                                                                                                                 |
| 9           | Wash         | Volume: 4 mL, Drain Time: 10 s                                                                                                                                                                                                                                                                                                                                 |
| 10          | Wash         | Volume: 4 mL, Drain Time: 10 s                                                                                                                                                                                                                                                                                                                                 |
| 11          | Wash         | Volume: 4 mL, Drain Time: 10 s                                                                                                                                                                                                                                                                                                                                 |

Table S10: Settings for **Single 50 °C 10 min Coupling CSY**.

| Cycle Steps |              | Parameter values                                                                                                                                                                                                                                                                                                                                                   |
|-------------|--------------|--------------------------------------------------------------------------------------------------------------------------------------------------------------------------------------------------------------------------------------------------------------------------------------------------------------------------------------------------------------------|
| 1           | Deprotection | Reaction Method: Conventional Deprotection, Deprotection Volume: 4 mL                                                                                                                                                                                                                                                                                              |
| 2           | Deprotection | Reaction Method: Conventional Deprotection, Deprotection Volume: 4 mL                                                                                                                                                                                                                                                                                              |
| 3           | Wash         | Volume: 4 mL, Drain Time: 10 s                                                                                                                                                                                                                                                                                                                                     |
| 4           | Wash         | Volume: 4 mL, Drain Time: 5 s                                                                                                                                                                                                                                                                                                                                      |
| 5           | Wash         | Volume: 4 mL, Drain Time: 5 s                                                                                                                                                                                                                                                                                                                                      |
| 6           | Wash         | Volume: 4 mL, Drain Time: 5 s                                                                                                                                                                                                                                                                                                                                      |
| 7           | Coupling     | Reaction Method: 50 °C 10 min coupling, Amino Acid: from method, Amino Acid Volume: 2.5 mL, Activator Bottle Position: PositionACT, Activator Volume: 2 mL, Activator Base Position: PositionACTB, Activator Base Volume: 1 mL, Delayed Reagent Time: 0 s, Delayed Reagent Bottle Position: PositionACTB, Delayed Reagent Volume: 0 mL, Manifold Wash Volume: 2 mL |
| 8           | Wash         | Volume: 4 mL, Drain Time: 10 s                                                                                                                                                                                                                                                                                                                                     |
| 9           | Wash         | Volume: 4 mL, Drain Time: 10 s                                                                                                                                                                                                                                                                                                                                     |
| 10          | Wash         | Volume: 4 mL, Drain Time: 10 s                                                                                                                                                                                                                                                                                                                                     |
| 11          | Wash         | Volume: 4 mL, Drain Time: 10 s                                                                                                                                                                                                                                                                                                                                     |

Table S11: Settings for **Double Coupling**.

| Cycle Steps |              | Parameter values                                                                                                                                                                                                                                                                                                                                                 |
|-------------|--------------|------------------------------------------------------------------------------------------------------------------------------------------------------------------------------------------------------------------------------------------------------------------------------------------------------------------------------------------------------------------|
| 1           | Deprotection | Reaction Method: Standard Deprotection, Deprotection Volume: 4 mL                                                                                                                                                                                                                                                                                                |
| 2           | Wash         | Volume: 4 mL, Drain Time: 10 s                                                                                                                                                                                                                                                                                                                                   |
| 3           | Wash         | Volume: 4 mL, Drain Time: 5 s                                                                                                                                                                                                                                                                                                                                    |
| 4           | Wash         | Volume: 4 mL, Drain Time: 5 s                                                                                                                                                                                                                                                                                                                                    |
| 5           | Wash         | Volume: 4 mL, Drain Time: 5 s                                                                                                                                                                                                                                                                                                                                    |
| 6           | Coupling     | Reaction Method: Standard coupling, Amino Acid: from method, Amino Acid Volume: 2.5 mL, Activator Bottle Position: Position ACT, Activator Volume: 2 mL, Activator Base Position: Position ACTB, Activator Base Volume: 1 mL, Delayed Reagent Time: 0 s, Delayed Reagent Bottle Position: PositionACTB, Delayed Reagent Volume: 0 mL, Manifold Wash Volume: 2 mL |
| 7           | Wash         | Volume: 4 mL, Drain Time: 5 s                                                                                                                                                                                                                                                                                                                                    |
| 8           | Coupling     | see step 6                                                                                                                                                                                                                                                                                                                                                       |
| 9           | Wash         | Volume: 4 mL, Drain Time: 10 s                                                                                                                                                                                                                                                                                                                                   |
| 10          | Wash         | Volume: 4 mL, Drain Time: 5 s                                                                                                                                                                                                                                                                                                                                    |

Table S12: Settings for **Double Coupling Gly**.

| Cycle Steps |              | Parameter values                                                                                                                                                                                                                                                                                                                                                 |
|-------------|--------------|------------------------------------------------------------------------------------------------------------------------------------------------------------------------------------------------------------------------------------------------------------------------------------------------------------------------------------------------------------------|
| 1           | Deprotection | Reaction Method: Standard Deprotection, Deprotection Volume: 4 mL                                                                                                                                                                                                                                                                                                |
| 2           | Wash         | Volume: 4 mL, Drain Time: 10 s                                                                                                                                                                                                                                                                                                                                   |
| 3           | Wash         | Volume: 4 mL, Drain Time: 5 s                                                                                                                                                                                                                                                                                                                                    |
| 4           | Wash         | Volume: 4 mL, Drain Time: 5 s                                                                                                                                                                                                                                                                                                                                    |
| 5           | Wash         | Volume: 4 mL, Drain Time: 5 s                                                                                                                                                                                                                                                                                                                                    |
| 6           | Wash         | Volume: 4 mL, Drain Time: 5 s                                                                                                                                                                                                                                                                                                                                    |
| 7           | Wash         | Volume: 4 mL, Drain Time: 10 s                                                                                                                                                                                                                                                                                                                                   |
| 8           | Coupling     | Reaction Method: Standard coupling, Amino Acid: from method, Amino Acid Volume: 2.5 mL, Activator Bottle Position: Position ACT, Activator Volume: 2 mL, Activator Base Position: Position ACTB, Activator Base Volume: 1 mL, Delayed Reagent Time: 0 s, Delayed Reagent Bottle Position: PositionACTB, Delayed Reagent Volume: 0 mL, Manifold Wash Volume: 2 mL |
| 9           | Wash         | Volume: 4 mL, Drain Time: 10 s                                                                                                                                                                                                                                                                                                                                   |
| 10          | Wash         | Volume: 4 mL, Drain Time: 10 s                                                                                                                                                                                                                                                                                                                                   |
| 11          | Coupling     | see step 8                                                                                                                                                                                                                                                                                                                                                       |
| 12          | Wash         | Volume: 4 mL, Drain Time: 10 s                                                                                                                                                                                                                                                                                                                                   |
| 13          | Wash         | Volume: 4 mL, Drain Time: 5 s                                                                                                                                                                                                                                                                                                                                    |
| 14          | Wash         | Volume: 4 mL, Drain Time: 5 s                                                                                                                                                                                                                                                                                                                                    |
| 15          | Wash         | Volume: 4 mL, Drain Time: 5 s                                                                                                                                                                                                                                                                                                                                    |

Table S13: Settings for **Double Coupling Cool Down**.

| Cycle Steps |              | Parameter values                                                                                                                                                                                                                                                                                                                                                 |
|-------------|--------------|------------------------------------------------------------------------------------------------------------------------------------------------------------------------------------------------------------------------------------------------------------------------------------------------------------------------------------------------------------------|
| 1           | Deprotection | Reaction Method: Standard Deprotection, Deprotection Volume: 4 mL                                                                                                                                                                                                                                                                                                |
| 2           | Wash         | Volume: 4 mL, Drain Time: 10 s                                                                                                                                                                                                                                                                                                                                   |
| 3           | Wash         | Volume: 4 mL, Drain Time: 5 s                                                                                                                                                                                                                                                                                                                                    |
| 4           | Wash         | Volume: 4 mL, Drain Time: 5 s                                                                                                                                                                                                                                                                                                                                    |
| 5           | Wash         | Volume: 4 mL, Drain Time: 5 s                                                                                                                                                                                                                                                                                                                                    |
| 6           | Wash         | Volume: 4 mL, Drain Time: 5 s                                                                                                                                                                                                                                                                                                                                    |
| 7           | Wash         | Volume: 4 mL, Drain Time: 10 s                                                                                                                                                                                                                                                                                                                                   |
| 8           | Coupling     | Reaction Method: Standard coupling, Amino Acid: from method, Amino Acid Volume: 2.5 mL, Activator Bottle Position: Position ACT, Activator Volume: 2 mL, Activator Base Position: Position ACTB, Activator Base Volume: 1 mL, Delayed Reagent Time: 0 s, Delayed Reagent Bottle Position: PositionACTB, Delayed Reagent Volume: 0 mL, Manifold Wash Volume: 2 mL |
| 9           | Wash         | Volume: 4 mL, Drain Time: 10 s                                                                                                                                                                                                                                                                                                                                   |
| 10          | Wash         | Volume: 4 mL, Drain Time: 10 s                                                                                                                                                                                                                                                                                                                                   |
| 11          | Coupling     | see step 8                                                                                                                                                                                                                                                                                                                                                       |
| 12          | Wash         | Volume: 4 mL, Drain Time: 10 s                                                                                                                                                                                                                                                                                                                                   |
| 13          | Wash         | Volume: 4 mL, Drain Time: 10 s                                                                                                                                                                                                                                                                                                                                   |
| 14          | Wash         | Volume: 4 mL, Drain Time: 10 s                                                                                                                                                                                                                                                                                                                                   |
| 15          | Wash         | Volume: 4 mL, Drain Time: 10 s                                                                                                                                                                                                                                                                                                                                   |



Table S14: Settings for **Double Coupling CSY**.

| Cycle Steps |              | Parameter values                                                                                                                                                                                                                                                                                                                                                 |
|-------------|--------------|------------------------------------------------------------------------------------------------------------------------------------------------------------------------------------------------------------------------------------------------------------------------------------------------------------------------------------------------------------------|
| 1           | Deprotection | Reaction Method: Conventional Deprotection, Deprotection Volume: 4 mL                                                                                                                                                                                                                                                                                            |
| 2           | Deprotection | Reaction Method: Conventional Deprotection, Deprotection Volume: 4 mL                                                                                                                                                                                                                                                                                            |
| 3           | Wash         | Volume: 4 mL, Drain Time: 10 s                                                                                                                                                                                                                                                                                                                                   |
| 4           | Wash         | Volume: 4 mL, Drain Time: 5 s                                                                                                                                                                                                                                                                                                                                    |
| 5           | Wash         | Volume: 4 mL, Drain Time: 5 s                                                                                                                                                                                                                                                                                                                                    |
| 6           | Wash         | Volume: 4 mL, Drain Time: 5 s                                                                                                                                                                                                                                                                                                                                    |
| 7           | Wash         | Volume: 4 mL, Drain Time: 5 s                                                                                                                                                                                                                                                                                                                                    |
| 8           | Wash         | Volume: 4 mL, Drain Time: 10 s                                                                                                                                                                                                                                                                                                                                   |
| 9           | Coupling     | Reaction Method: Standard coupling, Amino Acid: from method, Amino Acid Volume: 2.5 mL, Activator Bottle Position: Position ACT, Activator Volume: 2 mL, Activator Base Position: Position ACTB, Activator Base Volume: 1 mL, Delayed Reagent Time: 0 s, Delayed Reagent Bottle Position: PositionACTB, Delayed Reagent Volume: 0 mL, Manifold Wash Volume: 2 mL |
| 10          | Wash         | Volume: 4 mL, Drain Time: 10 s                                                                                                                                                                                                                                                                                                                                   |
| 11          | Wash         | Volume: 4 mL, Drain Time: 10 s                                                                                                                                                                                                                                                                                                                                   |
| 12          | Coupling     | see step 9                                                                                                                                                                                                                                                                                                                                                       |
| 13          | Wash         | Volume: 4 mL, Drain Time: 10 s                                                                                                                                                                                                                                                                                                                                   |
| 14          | Wash         | Volume: 4 mL, Drain Time: 10 s                                                                                                                                                                                                                                                                                                                                   |
| 15          | Wash         | Volume: 4 mL, Drain Time: 10 s                                                                                                                                                                                                                                                                                                                                   |
| 16          | Wash         | Volume: 4 mL, Drain Time: 10 s                                                                                                                                                                                                                                                                                                                                   |

Table S15: Settings for **Final Deprotection**.

| Cycle Steps |              | Parameter values                                                  |
|-------------|--------------|-------------------------------------------------------------------|
| 1           | Deprotection | Reaction Method: Standard Deprotection, Deprotection Volume: 4 mL |
| 2           | Wash         | Volume: 4 mL, Drain Time: 5 s                                     |
| 3           | Wash         | Volume: 4 mL, Drain Time: 5 s                                     |
| 4           | Wash         | Volume: 4 mL, Drain Time: 5 s                                     |
| 5           | Wash         | Volume: 4 mL, Drain Time: 5 s                                     |

Table S16: Settings for **RT Final Deprotection**.

| Cycle Steps |              | Parameter values                                                      |
|-------------|--------------|-----------------------------------------------------------------------|
| 1           | Deprotection | Reaction Method: Conventional Deprotection, Deprotection Volume: 4 mL |
| 2           | Deprotection | Reaction Method: Conventional Deprotection, Deprotection Volume: 4 mL |
| 3           | Wash         | Volume: 4 mL, Drain Time: 10 s                                        |
| 4           | Wash         | Volume: 4 mL, Drain Time: 5 s                                         |
| 5           | Wash         | Volume: 4 mL, Drain Time: 5 s                                         |
| 6           | Wash         | Volume: 4 mL, Drain Time: 5 s                                         |

## 2.3.5 Specific synthetic methods for peptide 1 to 4

### 2.3.5.1 Peptide 1

Resin: H-Gly-HMPB-ChemMatrix® 200 mg, 0.5 mmol/g, 0.1 mmol scale.

The peptide was not acetylated.

Cleavage cocktail: TFA (8.5 mL), TIPS (1 mL), water (0.5 mL).

Table S17: Settings for the synthesis of peptide 1.

|    | Step               | Used Cycles (Standard conditions) | Used Cycles (optimized conditions) |
|----|--------------------|-----------------------------------|------------------------------------|
| 1  | Resin swelling     | Resin swelling                    | Resin swelling                     |
| 2  | G                  | already loaded                    | already loaded                     |
| 3  | S                  | First Single Coupling             | First Single Coupling              |
| 4  | P                  | Single Coupling                   | Single Coupling                    |
| 5  | R                  | Double Coupling                   | Double Coupling                    |
| 6  | E                  | Single Coupling                   | Single Coupling                    |
| 7  | W                  | Single Coupling                   | Single Coupling                    |
| 8  | Q                  | Single Coupling                   | Single Coupling                    |
| 9  | S                  | Single Coupling                   | Single Coupling                    |
| 10 | A                  | Single Coupling                   | Single Coupling                    |
| 11 | N                  | Single Coupling                   | Single Coupling                    |
| 12 | T                  | Single Coupling                   | Single Coupling                    |
| 13 | I                  | Single Coupling                   | Single Coupling                    |
| 14 | H                  | Single Coupling 50 °C             | Single Coupling 50 °C              |
| 15 | N                  | Single Coupling                   | Single Coupling                    |
| 16 | F                  | Single Coupling                   | Single Coupling                    |
| 17 | Y                  | Single Coupling                   | Single Coupling                    |
| 18 | Y                  | Single Coupling                   | Single Coupling                    |
| 19 | V                  | Single Coupling                   | Single Coupling                    |
| 20 | R                  | Double Coupling                   | Double Coupling                    |
| 21 | G                  | Double Coupling                   | Double Coupling Cool Down          |
| 22 | D(CSY)             | Single Coupling                   | Single Coupling CSY                |
| 23 | A                  | Single Coupling                   | Single Coupling CSY                |
| 24 | S                  | Single Coupling                   | Single Coupling CSY                |
| 25 | Nle                | Single Coupling                   | Single Coupling CSY                |
| 26 | R                  | Double Coupling                   | Double Coupling CSY                |
| 27 | K                  | Single Coupling                   | Single Coupling CSY                |
| 28 | E                  | Single Coupling                   | Single Coupling CSY                |
| 29 | W                  | Single Coupling                   | Single Coupling CSY                |
| 30 | G                  | Double Coupling                   | Double Coupling CSY                |
| 31 | P                  | Single Coupling                   | Single Coupling CSY                |
| 32 | P                  | Single Coupling                   | Single Coupling CSY                |
| 33 | L                  | Single Coupling                   | Single Coupling CSY                |
| 34 | K                  | Single Coupling                   | Single Coupling CSY                |
| 35 | Final deprotection | Final Deprotection                | RT Final Deprotection              |

### 2.3.5.2 Peptide 2

Resin: H-Rink-Amide-ChemMatrix® 200 mg, 0.5 mmol/g, 0.1 mmol scale.

The peptide was acetylated.

Cleavage cocktail: TFA (9.0 mL), TIPS (0.5 mL), water (0.5 mL).

Table S18: Settings for the synthesis of peptide 2.

| Step |                    | Used Cycles (optimized conditions) |
|------|--------------------|------------------------------------|
| 1    | Resin swelling     | Resin swelling                     |
| 2    | D(CSY)             | Double Coupling CSY                |
| 3    | H                  | Single 50 °C 10 min Coupling CSY   |
| 4    | P                  | Single Coupling CSY                |
| 5    | S                  | Single Coupling CSY                |
| 6    | L                  | Single Coupling CSY                |
| 7    | W                  | Single Coupling CSY                |
| 8    | S                  | Single Coupling CSY                |
| 9    | V                  | Single Coupling CSY                |
| 10   | L                  | Single Coupling CSY                |
| 11   | D(CSY)             | Single Coupling CSY                |
| 12   | T                  | Single Coupling CSY                |
| 13   | D(CSY)             | Single Coupling CSY                |
| 14   | A                  | Single Coupling CSY                |
| 15   | N                  | Single Coupling CSY                |
| 16   | W                  | Single Coupling CSY                |
| 17   | Y                  | Single Coupling CSY                |
| 18   | Y                  | Single Coupling CSY                |
| 19   | P                  | Single Coupling CSY                |
| 20   | L                  | Single Coupling CSY                |
| 21   | G                  | Double Coupling CSY                |
| 22   | S                  | Single Coupling CSY                |
| 23   | S                  | Single Coupling CSY                |
| 24   | P                  | Single Coupling CSY                |
| 25   | D(CSY)             | Single Coupling CSY                |
| 26   | F                  | Single Coupling CSY                |
| 27   | V                  | Single Coupling CSY                |
| 28   | K                  | Single Coupling CSY                |
| 29   | Y                  | Single Coupling CSY                |
| 30   | W                  | Single Coupling CSY                |
| 31   | S                  | Single Coupling CSY                |
| 32   | P                  | Single Coupling CSY                |
| 33   | P                  | Single Coupling CSY                |
| 34   | L                  | Single Coupling CSY                |
| 35   | G                  | Double Coupling CSY                |
| 36   | Final deprotection | RT Final Deprotection              |

### 2.3.5.3 Peptide 3

Resin: H-Rink-Amide-ChemMatrix® 100 mg, 0.5 mmol/g, 0.05 mmol scale (still amount of reagents were set for 0.1 mmol scale to drive reactions to completion).

The peptide was acetylated.

Cleavage cocktail: TFA (8.5 mL), TIPS (1 mL), water (0.5 mL).

Table S19: Settings for the synthesis of peptide 3.

| Step             | Used Cycles (optimized conditions) |
|------------------|------------------------------------|
| 1 Resin swelling | Resin swelling                     |
| 2 Y              | First Single Coupling              |
| 3 K              | Single Coupling                    |
| 4 E              | Single Coupling                    |
| 5 V              | Single Coupling                    |
| 6 Y              | Single Coupling                    |
| 7 P              | Single Coupling                    |
| 8 V              | Single Coupling                    |
| 9 P              | Single Coupling                    |
| 10 I             | Single Coupling                    |
| 11 Nle           | Single Coupling                    |
| 12 G             | Double Coupling Gly                |
| 13 R             | Double Coupling                    |
| 14 K             | Single Coupling                    |
| 15 G             | Double Coupling Gly                |
| 16 E             | Single Coupling                    |
| 17 S             | Single Coupling Cool Down          |
| 18 D(CSY)        | Single Coupling CSY                |
| 19 E             | Single Coupling CSY                |
| 20 A             | Single Coupling CSY                |
| 21 N             | Single Coupling CSY                |
| 22 W             | Single Coupling CSY                |
| 23 W             | Single Coupling CSY                |
| 24 Q             | Single Coupling CSY                |
| 25 E             | Single Coupling CSY                |
| 26 E             | Single Coupling CSY                |
| 27 P             | Single Coupling CSY                |
| 28 K             | Single Coupling CSY                |
| 29 D(CSY)        | Single Coupling CSY                |
| 30 R             | Double Coupling CSY                |
| 31 I             | Single Coupling CSY                |
| 32 R             | Double Coupling CSY                |
| 33 L             | Single Coupling CSY                |
| 34 I             | Single Coupling CSY                |
| 35 D(CSY)        | Single Coupling CSY                |
| 36 G             | Double Coupling CSY                |
| 37 K             | Single Coupling CSY                |
| 38 K             | Single Coupling CSY                |
| 39 F             | Single Coupling CSY                |
| 40 P             | Single Coupling CSY                |
| 41 L             | Single Coupling CSY                |
| 42 D(CSY)        | Single Coupling CSY                |
| 43 E             | Single Coupling CSY                |
| 44 E             | Single Coupling CSY                |
| 45 D(CSY)        | Single Coupling CSY                |
| 46 N             | Single Coupling CSY                |
| 47 G             | Double Coupling CSY                |
| 48 N             | Single Coupling CSY                |
| 49 F             | Single Coupling CSY                |
| 50 D(CSY)        | Single Coupling CSY                |
| 51 F             | Single Coupling CSY                |
| 52 L             | Single Coupling CSY                |
| 53 A             | Single Coupling CSY                |

|           |                    |                       |
|-----------|--------------------|-----------------------|
| <b>54</b> | R                  | Double Coupling CSY   |
| <b>55</b> | V                  | Single Coupling CSY   |
| <b>56</b> | Y                  | Single Coupling CSY   |
| <b>57</b> | E                  | Single Coupling CSY   |
| <b>58</b> | A                  | Single Coupling CSY   |
| <b>59</b> | Final deprotection | RT Final Deprotection |

#### 2.3.5.4 Peptide 4

Resin: H-Rink-Amide-ChemMatrix® 200 mg, 0.5 mmol/g, 0.1 mmol scale.

The peptide was acetylated.

Cleavage cocktail: TFA (9.5 mL), TIPS (0.25 mL), water (0.25 mL).

Table S20: Settings for the synthesis of peptide 3.

|          | <b>Step</b>        | <b>Used Cycles (synthesis at room temperature)</b> | <b>Used Cycles (optimized method)</b> |
|----------|--------------------|----------------------------------------------------|---------------------------------------|
| <b>1</b> | Resin swelling     | Resin swelling                                     | Resin swelling                        |
| <b>2</b> | A                  | First Single Coupling                              | First Single Coupling                 |
| <b>3</b> | L                  | Single Coupling                                    | Single Coupling                       |
| <b>4</b> | G                  | Double Coupling                                    | Double Coupling Cool Down             |
| <b>5</b> | D(CSY)             | Single RT Coupling                                 | Single Coupling CSY                   |
| <b>6</b> | F                  | Single RT Coupling                                 | Single Coupling CSY                   |
| <b>7</b> | Final Deprotection | RT Final Deprotection                              | RT Final Deprotection                 |

## 2.4 Screening for optimal Fmoc-deprotection and coupling conditions

To a *CEM* microwave pressure vessel (10 mL volume) containing a stirring bar resin-bound test peptide **4** (20 mg) and solutions (I) to (V) (2 mL) (see Table S21) were added and the vessel was then sealed. The filled vessel was placed into a *CEM Discovery* microwave reactor and reactions were performed under the following condition:

Dynamic mode,  $T = 90\text{ }^{\circ}\text{C}$ , microwave power = 100 W,  $p$  up to 250 psi allowed, stirring speed: high, premixing: no, reaction time see Table S21.

Afterwards, the resin was filtered off, washed with DCM (10 x) and dried under reduced pressure. The dry resin was treated with TFA (950  $\mu\text{L}$ ), TIPS (25  $\mu\text{L}$ ) and water (25  $\mu\text{L}$ ) for 5 h. The resin was filtered off and washed with TFA (2 x 1 mL). The TFA was removed in a stream of nitrogen and the peptide was precipitated from cold  $\text{Et}_2\text{O}$  (10 mL) and isolated by centrifugation. The residue was washed with cold  $\text{Et}_2\text{O}$  (2 x 10 mL), briefly air-dried, dissolved in 20% MeCN in  $\text{H}_2\text{O}$  + 0.1% TFA (2 mL), and analyzed by MALDI-TOF-MS and analytical HPLC. For HPLC, an aliquot (5  $\mu\text{L}$ ) was mixed with buffer A (45  $\mu\text{L}$ ).

Table S21: Conditions for screening.

| Reaction | Reagents                                                                                                | Reaction time (min) |
|----------|---------------------------------------------------------------------------------------------------------|---------------------|
| I        | -                                                                                                       | -                   |
| II       | DMF                                                                                                     | 30                  |
| IIIa     | Piperidine/DMF 1:4 v/v                                                                                  | 1                   |
| IIIb     | Piperidine/DMF 1:4 v/v                                                                                  | 10                  |
| IIIc     | Piperidine/DMF 1:4 v/v                                                                                  | 30                  |
| IV       | DBU/DMF 1:49 v/v                                                                                        | 30                  |
| V        | DMF (2 mL) + 0.5 M DIC solution in DMF (2 mL) + 1 M Oxyma solution in DMF containing 0.1 M DIPEA (1 mL) | 30                  |

## 2.5 CD Spectroscopy

GENERAL: CD-measurements were performed using quartz cuvettes from *Starna* on a *Jasco J-810* CD spectrometer, equipped with *Jasco PTC-423S* Peltier thermostatted rectangular cell holder. The measuring chamber was flushed constantly with nitrogen. Settings: Data pitch: 0.1 nm; scanning speed: 100 nm/min, sensitivity: low, response: 2 s; bandwidth: 1 nm. The peptide concentration was 50  $\mu\text{M}$  (20  $\mu\text{M}$  for peptide **2**) and 10 mM sodium phosphate buffer at pH 7.0 was used.

SPECTRA MEASUREMENT: CD spectra were recorded from 190 to 260 nm in 0.1 cm cuvettes at 20  $^{\circ}\text{C}$ . After placing the cuvette into the holder, the sample was left to equilibrate for 5 min prior to measurement. 10 spectra were recorded and the data were accumulated. The measured ellipticity  $\Theta$  (in mdeg) was converted to mean residue ellipticity  $[\Theta]$  (in  $\text{deg}\cdot\text{cm}^2\cdot\text{dmol}^{-1}\cdot\text{res}^{-1}$ ) using Eq. 1 where  $\Theta_{\text{Blank}}$  is the blank signal,  $c$  is the peptide concentration in mol/L,  $l$  is the pathlength in mm and  $n$  is the number of backbone peptide bonds.<sup>3</sup>

$$[\Theta] = \frac{\Theta - \Theta_{\text{Blank}}}{c \cdot l \cdot n} \quad \text{Eq. 1}$$

THERMAL DENATURATION: Melting curves were recorded from 2 to 98  $^{\circ}\text{C}$  in 0.1 cm cuvettes using  $[\Theta]$  at the maximum, respectively (**1**(CSY) and **1**: 227 nm, **2**(CSY) and **2**: 228 nm, **3**(CSY) and **3**: 221 nm), with a temperature gradient of 1  $^{\circ}\text{C}/\text{min}$ . Data points were collected every 1  $^{\circ}\text{C}$ . The thermal denaturation data were fitted to Eq. 2 ( $A = a \cdot T + b$ ,  $B = c \cdot T + d$ , linear fit of the upper and lower baseline,  $\Delta H$ : molar enthalpy,  $R$ : universal gas constant) to determine the melting temperature  $T_m$  (in  $^{\circ}\text{C}$ ):<sup>4</sup>

$$[\Theta]_{227\text{ nm}}(T) = A + \frac{B - A}{1 + \exp\left(\frac{-\Delta H \cdot \left(1 - \frac{T + 273.15\text{ K}}{T_m + 273.15\text{ K}}\right)}{R \cdot (T + 273.15\text{ K})}\right)} \quad \text{Eq. 2}$$

## 2.6 NMR spectroscopy

Products of organic synthesis were prepared for NMR spectroscopy by dissolving them in the deuterated organic solvent DMSO- $d_6$  ( $^1\text{H}$ -NMR spectra referenced at 2.50 ppm,  $^{13}\text{C}$ -NMR spectra at 39.52 ppm) inside an NMR tube with a diameter of 5 mm.  $^1\text{H}$ -NMR,  $^{13}\text{C}$ -NMR,  $^1\text{H}$ - $^1\text{H}$ -COSY and  $^1\text{H}$ - $^{13}\text{C}$ -HSQC spectra were recorded using a *Bruker Avance III 600* NMR system for Fmoc-Asp(CSY)-OtBu and a *Bruker Avance III 400* NMR measuring system for Fmoc-Asp(CSY)-OH.  $^1\text{H}$ -NMR spectra of other purified fractions were recorded on a *Bruker Avance III 300* device to confirm purity.

Spectra processing and analysis was performed using *TopSpin 3.6.1* and *MestReNova 14.1.2*. Signal multiplicities were abbreviated with s (singlet), d (doublet), t (triplet), q (quartet) and m (multiplet).

## 2.7 IR-Spectroscopy

ATR-IR spectroscopy was performed on the *FT/IR-4600* Fourier transformation infrared spectrometer from *Jasco*. Spectra were recorded in a range from 500 to 4000  $\text{cm}^{-1}$  with a resolution of 4  $\text{cm}^{-1}$ .

## 2.8 Mass spectrometry

Peptides were analysed by matrix-assisted laser desorption/ionisation (MALDI) combined with time of flight (TOF) analysis that was performed on a *Bruker Autoflex Speed* MALDI-TOF mass spectrometer. Spectra were measured in reflector mode (peptide **1** and **2**: 1000 to 8000 Da, **3**: 3 to 15 kDa, **4**: 20 to 1500 Da). Samples were prepared by applying a saturated 2,5-dihydroxybenzoic acid solution as a matrix (1  $\mu\text{L}$ ) together with the solubilized sample (1  $\mu\text{L}$ ) on a suitable target plate for MALDI-MS measurement and mixing on the plate.

The products of organic synthesis were analysed by electrospray-ionisation mass spectrometry (ESI) using a *ApexQe FT-ICR* mass spectrometer by *Bruker*.

Table S22: Important mass differences.

| Modification                                                     | $\Delta m/z$ (monoisotopic mass) | $\Delta m/z$ (average mass) |
|------------------------------------------------------------------|----------------------------------|-----------------------------|
| native peptide + CSY                                             | + 83.0                           | + 83.2                      |
| Aspartimide formation (native peptide – water)                   | – 18.0                           | – 18.0                      |
| Piperidine amide formation (native peptide – water + piperidine) | + 67.1                           | + 67.1                      |

## 2.9 Melting point determination

The melting point of Fmoc-Asp(CSY)-OH was determined using a melting point meter *M5000* by *Krüß* in a 1 mm capillary tube.

## 2.10 Deprotection of CSY

The reactions were performed in polypropylene reaction tubes. After each addition of reagent, the mixture was vortexed and spun down with a small tabletop centrifuge. After completion of the reaction, an aliquot (10  $\mu$ L) was taken, diluted with buffer A (10  $\mu$ L) and analyzed with analytical HPLC.

(a) Conditions according to Neuman *et al.*<sup>1</sup>

CSY protected peptide (25 nmol) was dissolved in acetate buffer 10 mM (200  $\mu$ L). NCS in MeCN (concentration of NCS in case of **1**(CSY): 1.25 mM, **2**(CSY): 5 mM, **3**(CSY): 7.5 mM) was added (4 x 11  $\mu$ L, in total 2.2 equiv. per CSY group). Between each addition, the mixture was equilibrated for 10 min. The reaction was quenched with sodium ascorbate in 10% MeCN in water (concentration of sodium ascorbate in case of **1**(CSY): 7.5 mM, **2**(CSY): 30 mM, **3**(CSY): 45 mM) was added (44  $\mu$ L, 6.0 equiv. regarding to NCS).

(b)

CSY protected peptide (250 nmol) was dissolved in buffer A (1800  $\mu$ L) and HFIP (200  $\mu$ L). NCS dissolved in buffer B (concentration of NCS in case of **1**(CSY): 1.25 mM, **2**(CSY): 5 mM, **3**(CSY): 7.5 mM) was added (4 x 110  $\mu$ L, in total 2.2 equiv. per CSY group). Between each addition, the mixture was equilibrated for 10 min. The reaction was quenched with sodium ascorbate in 10% B in A (concentration of sodium ascorbate in case of **1**(CSY): 7.5 mM, **2**(CSY): 30 mM, **3**(CSY): 45 mM) was added (440  $\mu$ L, 6.0 equiv. regarding to NCS). The samples were frozen in liquid nitrogen and freeze-dried to obtain a colorless foam, which was further purified by HPLC.

(c) preparative scale

**2**(CSY) (250 nmol) was dissolved in buffer A (1 mL), DMF (800  $\mu$ L) and HFIP (200  $\mu$ L). NCS in DMF (5 mM, 4 x 110  $\mu$ L, in total 2.2 equiv. per CSY group) was added. Between each addition, the mixture was equilibrated for 5 min. The reaction was quenched with sodium ascorbate in buffer A (100 mM, 110  $\mu$ L, 5.0 equiv. regarding to NCS) and buffer A:DMF 1:1 (1450  $\mu$ L) was added. The mixture was directly injected into the HPLC. Due to high content of DMF several peaks can occur, which all contain peptide. These were collected, pooled and re-purified after freeze drying.

(c) analytical scale

CSY protected peptide (25 nmol) was dissolved in buffer A (100  $\mu$ L), HFIP (20  $\mu$ L) and DMF (80  $\mu$ L). NCS in DMF (5 mM, **1**(CSY): 4 x 2.75  $\mu$ L, **2**(CSY): 4 x 11  $\mu$ L, **3**(CSY): 4 x 16.5  $\mu$ L, in total 2.2 equiv. per CSY group) was added. Between each addition, the mixture was equilibrated for 5 min. The reaction was quenched with sodium ascorbate in buffer A (100 mM, **1**(CSY): 2.75  $\mu$ L, **2**(CSY): 11  $\mu$ L, **3**(CSY): 16.5  $\mu$ L, 5.0 equiv. regarding to NCS) and buffer A (**1**(CSY): 186.25  $\mu$ L, **2**(CSY): 145  $\mu$ L, **3**(CSY): 117.5  $\mu$ L) was added.

(d)

CSY protected peptide (25 nmol) was dissolved in buffer A (100  $\mu$ L), HFIP (20  $\mu$ L) and TFE (80  $\mu$ L). NCS in DMF (5 mM, **1**(CSY): 4 x 2.75  $\mu$ L, **2**(CSY): 4 x 11  $\mu$ L, **3**(CSY): 4 x 16.5  $\mu$ L, in total 2.2 equiv. per CSY group) was added. Between each addition, the mixture was equilibrated for 5 min. The reaction was quenched with sodium ascorbate in buffer A (100 mM, **1**(CSY): 2.75  $\mu$ L, **2**(CSY): 11  $\mu$ L, **3**(CSY): 16.5  $\mu$ L, 5.0 equiv. regarding to NCS) and buffer A (**1**(CSY): 186.25  $\mu$ L, **2**(CSY): 145  $\mu$ L, **3**(CSY): 117.5  $\mu$ L) was added.

(e)

CSY protected peptide (25 nmol) was dissolved in buffer A (100  $\mu$ L), HFIP (20  $\mu$ L) and TFE (80  $\mu$ L). NCS in MeCN (5 mM, **1**(CSY): 4 x 2.75  $\mu$ L, **2**(CSY): 4 x 11  $\mu$ L, **3**(CSY): 4 x 16.5  $\mu$ L, in total 2.2 equiv. per CSY group) was added. Between each addition, the mixture was equilibrated for 5 min. The reaction was quenched with sodium ascorbate in buffer A (100 mM, **1**(CSY): 2.75  $\mu$ L, **2**(CSY): 11  $\mu$ L, **3**(CSY): 16.5  $\mu$ L, 5.0 equiv. regarding to NCS) and buffer A (**1**(CSY): 186.25  $\mu$ L, **2**(CSY): 145  $\mu$ L, **3**(CSY): 117.5  $\mu$ L) was added.

(f)

CSY protected peptide (250 nmol) was dissolved in buffer A (1800  $\mu$ L) and HFIP (200  $\mu$ L). NCS in MeOH + 0.1% TFA (5 mM, **1**(CSY): 4 x 27.5  $\mu$ L, **2**(CSY): 4 x 110  $\mu$ L, **3**(CSY): 4 x 165  $\mu$ L, in total 2.2 equiv.



per CSY group) was added. Between each addition, the mixture was equilibrated for 10 min. The reaction was quenched with sodium ascorbate in buffer A (100 mM, **1**(CSY): 27.5 µL, **2**(CSY): 110 µL, **3**(CSY): 165 µL, 5.0 equiv. regarding to NCS) and buffer A (**1**(CSY): 1862.5 µL, **2**(CSY): 1450 µL, **3**(CSY): 1175 µL) was added.

(g)

CSY protected peptide (250 nmol) was dissolved in buffer A (500 µL) and guanidine hydrochloride in buffer A (6.0 M, 1500 µL). NCS in buffer B (5 mM, **1**(CSY): 4 x 27.5 µL, **2**(CSY): 4 x 110 µL, **3**(CSY): 4 x 165 µL, in total 2.2 equiv. per CSY group) was added. Between each addition, the mixture was equilibrated for 10 min. The reaction was quenched with sodium ascorbate in buffer A (100 mM, **1**(CSY): 27.5 µL, **2**(CSY): 110 µL, **3**(CSY): 165 µL, 5.0 equiv. regarding to NCS) and buffer A (**1**(CSY): 1862.5 µL, **2**(CSY): 1450 µL, **3**(CSY): 1175 µL) was added.

(h)

CSY protected peptide (250 nmol) was dissolved in buffer A (1050 µL), guanidine hydrochloride in buffer A (6.0 M, 750 µL) and TFE (200 µL). NCS in buffer B (5 mM, **1**(CSY): 4 x 27.5 µL, **2**(CSY): 4 x 110 µL, **3**(CSY): 4 x 165 µL, in total 2.2 equiv. per CSY group) was added. Between each addition, the mixture was equilibrated for 10 min. The reaction was quenched with sodium ascorbate in buffer A (100 mM, **1**(CSY): 27.5 µL, **2**(CSY): 110 µL, **3**(CSY): 165 µL, 5.0 equiv. regarding to NCS) and buffer A (**1**(CSY): 1862.5 µL, **2**(CSY): 1450 µL, **3**(CSY): 1175 µL) was added.

## 2.11 CSY Deprotection of Fmoc-Asp(CSY)-OH

The reactions were performed in polypropylene reaction tubes. After each addition of reagent, the mixture was vortexed and spun down with a small tabletop centrifuge. A solution of Fmoc-Asp(CSY)-OH in MeCN or buffer B (2 mM, 10 µL, 1 equiv.) was mixed with the solvent system summarized in Table S23. The oxidant solution (4 mM, 2 x 5 µL, 2 equiv.) (Table S22) was then added. Between the additions, the mixture was equilibrated for 5 min. The reaction was quenched by addition of sodium ascorbate in 10% MeCN in water (20 mM, 10 µL, 10 equiv.). An aliquot (10 µL) was taken, diluted with buffer A (10 µL) and analysed with analytical HPLC.

Table S23: Conditions for the deprotection of Fmoc-Asp(CSY)-OH.

|          | Fmoc-Asp(CSY)-OH<br>(2 mM) dissolved in |                                                                                  | solvent system                      | oxidant solution<br>(4 mM) |
|----------|-----------------------------------------|----------------------------------------------------------------------------------|-------------------------------------|----------------------------|
| <b>a</b> | buffer B                                |                                                                                  | buffer B (10 µL), buffer A (180 µL) | buffer B, no oxidant       |
| <b>b</b> | buffer B                                |                                                                                  | buffer B (10 µL), buffer A (180 µL) | NCS in buffer B            |
| <b>c</b> | MeCN                                    | MeCN (10 µL), acetate buffer pH 4.5 (50 mM, 40 µL), H <sub>2</sub> O (140 µL)    |                                     | NCS in MeCN                |
| <b>d</b> | buffer B                                |                                                                                  | buffer B (10 µL), buffer A (180 µL) | Iodine in buffer B         |
| <b>e</b> | MeCN                                    | MeCN (10 µL), phosphate buffer pH 10.0 (50 mM, 40 µL), H <sub>2</sub> O (140 µL) |                                     | Iodine in MeCN             |
| <b>f</b> | MeCN                                    | MeCN (10 µL), acetate buffer pH 4.5 (50 mM, 40 µL), H <sub>2</sub> O (140 µL)    |                                     | NaIO <sub>4</sub> in water |
| <b>g</b> | MeCN                                    |                                                                                  | MeCN (10 µL), water (180 µL)        | Oxone in water             |
| <b>h</b> | buffer B                                |                                                                                  | buffer B (10 µL), buffer A (180 µL) | Oxone in buffer A          |
| <b>i</b> | MeCN                                    |                                                                                  | MeCN (10 µL), water (180 µL)        | mCPBA in water             |
| <b>j</b> | buffer B                                |                                                                                  | buffer B (10 µL), buffer A (180 µL) | mCPBA in buffer A          |

### 3 Organic Synthesis

#### 3.1 Synthesis of Fmoc-Asp(CSY)-OtBu

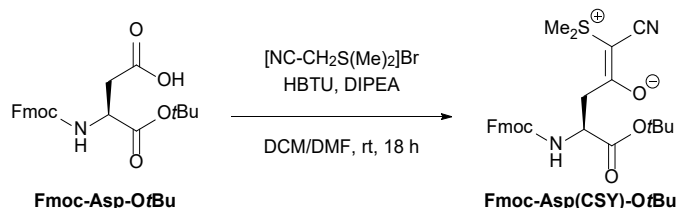

All reactions were performed in a nitrogen atmosphere. A mixture of dimethyl sulfide (2.27 g, 2.66 mL, 36.46 mmol, 1.50 equiv.) and 1-bromoacetonitrile (4.37 g, 2.54 mL, 36.46 mmol, 1.50 equiv.) was stirred for 18 h at room temperature.

The resulting (cyanomethyl)-di-methyl sulfonium bromide was suspended in dry DCM (40 mL) using ultrasonication for 15 min and stirred for another 10 min. For better solvation DMF (20 mL) was added to the suspension.

Separately, Fmoc-Asp-OtBu (10.00 g, 24.30 mmol, 1.00 equiv.) was dissolved in DMF (60 mL). HBTU (13.83 g, 36.46 mmol, 1.50 equiv.) was added and the suspension was stirred for 15 min. Then DIPEA (9.42 g, 12.40 mL, 72.90 mmol, 3.00 equiv.) was added and stirring continued for 10 min. The solution was transferred to the suspension of (cyanomethyl)-di-methyl sulfonium bromide and the flask was washed with DMF (30 mL), which also was transferred to the suspension. The reaction mixture was stirred at room temperature for 18 h. The reaction mixture was washed with 10% citric acid (200 mL) and the aqueous phase was then extracted with DCM (3 x 20 mL). The combined organic phases were concentrated *in vacuo*, then dissolved in ethyl acetate (200 mL) and washed with a saturated NaHCO<sub>3</sub> solution (100 mL), deionized H<sub>2</sub>O (3 x 100 mL) and brine (100 mL), respectively. The organic phase was dried over Na<sub>2</sub>SO<sub>4</sub>, filtered and the solvent was removed under reduced pressure.

The product-containing fractions were combined and the solvent was removed under reduced pressure to give an oily residue which was lyophilised to give Fmoc-Asp(CSY)-OtBu as a yellowish foam (11.46 g, 23.17 mmol, 95%).

**TLC:**  $R_f$  = 0.12 (SiO<sub>2</sub>, DCM:MeOH, 40:1).

**MS HR-ESI:**  $m/z$  495.1950 (calculated: 495.1948 for C<sub>27</sub>H<sub>31</sub>N<sub>2</sub>O<sub>5</sub>S<sup>+</sup> [M+H]<sup>+</sup>), 517.1769 (calculated: 517.1768 for C<sub>27</sub>H<sub>30</sub>N<sub>2</sub>NaO<sub>5</sub>S<sup>+</sup> [M+Na]<sup>+</sup>).

**IR (ATR):**  $\tilde{\nu}$  [cm<sup>-1</sup>] 3324.7, 2975.6, 2930.3, 2171.5 ( $\nu$  CN), 1714.4 ( $\nu$  CO), 1580.9 ( $\nu$  CO), 1499.8 ( $\nu$  CO), 1447.8, 1367.3, 1308.5, 1247.7, 1222.6, 1148.5, 1040.4, 988.3, 841.8, 759.8, 738.6, 619.2, 532.3.

**<sup>1</sup>H-NMR (600 MHz, DMSO-d<sub>6</sub>):**  $\delta$  [ppm] 7.89 (d,  $J$  = 7.5 Hz, 2H, H<sub>ar</sub>), 7.71 (d,  $J$  = 7.4 Hz, 2H, H<sub>ar</sub>), 7.56 (d,  $J$  = 8.4 Hz, 1H, NH), 7.42 (t,  $J$  = 7.5 Hz, 2H, H<sub>ar</sub>), 7.34-7.31 (m, 2H, H<sub>ar</sub>), 4.40-4.37 (m, 1H, C $\alpha$ H), 4.33-4.25 (m, 2H, CH<sub>2</sub>), 4.21 (t,  $J$  = 7.0 Hz, 1H, CH), 2.78 (s, 6H, S(CH<sub>3</sub>)<sub>2</sub>), 2.72 (t,  $J$  = 6.4 Hz, 2H, C $\beta$ H<sub>2</sub>), 1.37 (s, 9H, C(CH<sub>3</sub>)<sub>3</sub>).

**<sup>13</sup>C-NMR (151 MHz, DMSO-d<sub>6</sub>):**  $\delta$  [ppm] 185.65 (COON), 170.91 (COOC), 155.94 (CO), 143.93 (2 x C<sub>ar</sub>), 140.73 (2 x C<sub>ar</sub>), 127.66 (2 x CH<sub>ar</sub>), 127.09 (2 x CH<sub>ar</sub>), 125.27 (2 x CH<sub>ar</sub>), 120.14 (2 x CH<sub>ar</sub>), 119.37 (CN), 80.58 (C), 65.65 (CH<sub>2</sub>), 55.19 (C), 50.84 (C $\alpha$ H), 46.62 (CH), 39.57 (C $\beta$ H<sub>2</sub>), 27.60 (5 x CH<sub>3</sub>).

### 3.2 Synthesis of Fmoc-Asp(CSY)-OH

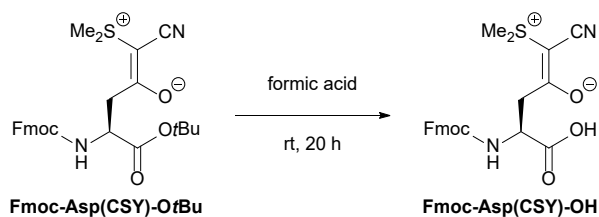

Fmoc-Asp(CSY)-OtBu (5.00 g, 10.11 mmol, 1.00 equiv.) was dissolved in formic acid (150 mL) and stirred at room temperature for 20 h. The organic acid was removed under reduced pressure. The oily residue was coevaporated with methanol (150 mL) and DCM (10 mL) yielding a yellow foam, which was again coevaporated with petrol ether (3 x 50 mL). The substance was dried *in vacuo* over NaHCO<sub>3</sub> overnight.

The yellow foam was dissolved in ethyl acetate (80 mL). Immediately a colourless precipitate was formed. The suspension stirred at room temperature for 3 h giving a thick slurry mixture. It was diluted with ethyl acetate (30 mL) and heated under reflux for 30 min. After cooling to room temperature, the colourless precipitate was filtered off, washed with ethyl acetate and dried under reduced pressure. The mother liquor was concentrated *in vacuo* to give a yellow foam again and was recrystallised from ethyl acetate (20 mL). Fmoc-Asp(CSY)-OH was yielded as a colourless powder (3.90 g, 8.89 mmol, 88%).

**Melting point:** 145 to 146 °C.

**TLC:**  $R_f$  = 0.55 (SiO<sub>2</sub>, DCM:MeOH:HCOOH, 10:1:0.1).

**MS HR-ESI:**  $m/z$  439.1325 (calculated: 439.1322 for C<sub>23</sub>H<sub>23</sub>N<sub>2</sub>O<sub>5</sub>S<sup>+</sup> [M+H]<sup>+</sup>).

**IR (ATR):**  $\tilde{\nu}$  [cm<sup>-1</sup>] 3520.5, 3475.7, 3377.3, 3025.4, 2930.0, 2181.4 ( $\nu$  CN), 1701.3 ( $\nu_{as}$  CO), 1522.4 ( $\nu$  CO), 1444.8 ( $\nu$  CO), 1325.5, 1259.9, 1221.2 1149.6, 1045.2, 997.5, 917.0, 779.8, 735.1, 633.7, 618.8, 583.0, 535.3.

**<sup>1</sup>H-NMR (400 MHz, DMSO-d<sub>6</sub>):**  $\delta$  [ppm] 12.61 (s, 1H, COOH), 7.89 (d,  $J$  = 7.6 Hz, 2H, H<sub>ar</sub>), 7.71 (d,  $J$  = 7.3 Hz, 2H, H<sub>ar</sub>), 7.51 (d,  $J$  = 8.4 Hz, NH), 7.42 (t,  $J$  = 7.5 Hz, 2H, H<sub>ar</sub>), 7.35-7.30 (m, 2H, H<sub>ar</sub>), 4.48-4.41 (m, 1H, C $\alpha$ H), 4.28-4.20 (m, 3H, CH, CH<sub>2</sub>), 2.89-2.73 (m, 8H, S(CH<sub>3</sub>)<sub>2</sub>, C $\beta$ H<sub>2</sub>).

**<sup>13</sup>C-NMR (101 MHz, DMSO-d<sub>6</sub>):**  $\delta$  [ppm] 185.81 (COON), 173.27 (COOH), 155.78 (CO), 143.81 (2 x C<sub>ar</sub>), 140.68 (2 x C<sub>ar</sub>), 127.61 (2 x CH<sub>ar</sub>), 127.06 (2 x CH<sub>ar</sub>), 125.27 (2 x CH<sub>ar</sub>), 120.08 (2 x CH<sub>ar</sub>), 119.27 (CN), 65.65 (CH<sub>2</sub>), 55.05 (C), 50.06 (C $\alpha$ H), 46.60 (CH), 39.67 (C $\beta$ H<sub>2</sub>), 27.54 (S(CH<sub>3</sub>)<sub>2</sub>).

#### 4 Calculation of the cost of the synthesis of Fmoc-Asp(CSY)-OH

The cost of the synthesis of Fmoc-Asp(CSY)-OH is calculated for the here presented procedure and is compared to the synthesis reported by Neumann *et al.*<sup>1</sup> Prices (Table S24) are given without taxes. Only reagents are included in the calculation because the usage of solvent and silica gel is comparable in both procedures.

Table S24: Prices of the used reagents for the synthesis of Fmoc-Asp(CSY)-OH.

| Reagent            | Supplier              | Package | Price / € | Price/g or mL |
|--------------------|-----------------------|---------|-----------|---------------|
| dimethyl sulfide   | Merck (Sigma-Aldrich) | 250 mL  | 35.77     | 0.14308 €/mL  |
| bromo acetonitrile | Merck (Sigma-Aldrich) | 25 g    | 70.20     | 2.80800 €/g   |
| Fmoc-Asp-OtBu      | Carbolution           | 25 g    | 152.50    | 6.10000 €/g   |
| T3P in EtOAC       | Merck (Sigma-Aldrich) | 10 mL   | 33.60     | 3.36000 €/mL  |
| HBTU               | Carbolution           | 100 g   | 49.50     | 0.49500 €/g   |
| DIPEA              | Merck (Sigma-Aldrich) | 500 mL  | 103.6     | 0.20720 €/mL  |
| TFA                | Merck (Sigma-Aldrich) | 500 mL  | 86.02     | 0.17204 €/mL  |
| formic acid        | VWR                   | 1000 mL | 11.34     | 0.01134 €/mL  |

##### **Cost of the synthesis reported in this work:**

First step: Fmoc-Asp(CSY)-OtBu

Used Reagents: dimethyl sulfide (2.66 mL), bromo acetonitrile (4.37 g), Fmoc-Asp-OtBu (10 g), HBTU (13.83 g), DIPEA (12.4 mL).

Total cost: 83.07 €

Yield: Fmoc-Asp(CSY)-OtBu (11.46 g)

price per g: 7.25 €/g

Second step: Fmoc-Asp(CSY)-OH

Used Reagents: Fmoc-Asp(CSY)-OtBu (5 g), formic acid (150 mL).

Total cost: 37.94 €

**Yield: Fmoc-Asp(CSY)-OH (3.90 g)**

**price per g: 9.73 €**

##### **Cost of the synthesis reported by Neumann *et al.*<sup>1</sup>**

First step: [NC-CH<sub>2</sub>-SMe<sub>2</sub>]Br

Used reagents: dimethyl sulfide (7.53 mL), bromo acetonitrile (12.35 g)

Total cost: 35.76 €

Yield: [NC-CH<sub>2</sub>-SMe<sub>2</sub>]Br 16.8 g

Price per g: 2.13 €/g

Second step: Fmoc-Asp(CSY)-OtBu

Used Reagents: [NC-CH<sub>2</sub>-SMe<sub>2</sub>]Br (0.53 g), Fmoc-Asp-OtBu (1 g), T3P(2.01 mL), DIPEA 1.29 mL).

Total cost: 14.25 €

Yield: Fmoc-Asp(CSY)-OtBu (1.07 g)

price per g: 13.32 €/g

Third step: Fmoc-Asp(CSY)-OH

Used Reagents: Fmoc-Asp(CSY)-OtBu (1 g), TFA (10 mL).

Total cost: 15.04 €

**Yield: Fmoc-Asp(CSY)-OH (0.85 g)**

**price per g: 17.69 €**

## 5 Characterization of peptides

### 5.1 Peptide 1(CSY)

H-KLPPGW~~EX~~S-~~AD~~(CSY)GRVYYFNHITNASQWERPSG-OH

Chemical formula: C<sub>179</sub>H<sub>264</sub>N<sub>52</sub>O<sub>48</sub>S, molar mass: 3944.5 g/mol, exact mass: 3942.0 Da

After final cleavage the crude product was obtained as a yellowish powder (143.5 mg). A part of it (42.6 mg) was purified by HPLC and after freeze-drying a colorless powder (12.1 mg, 3.07 μmol, 28%) was obtained.

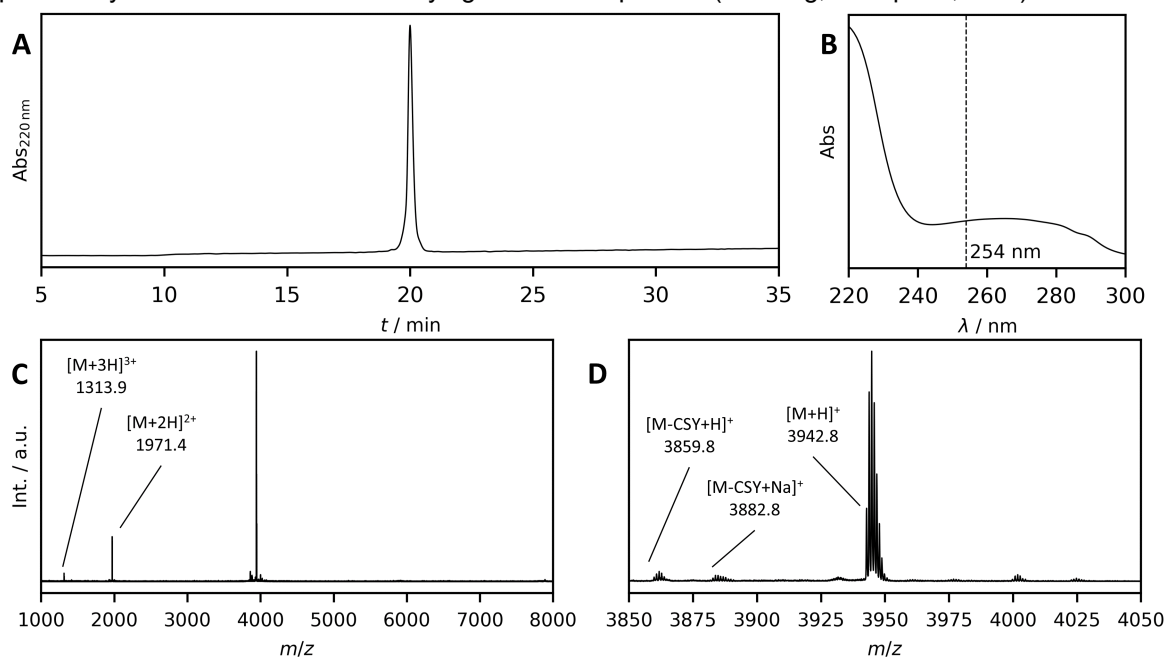

Figure S8: Analytical data for **1(CSY)**. A: analytical HPLC trace  $t_R = 20.0$  min. B: UV/Vis spectrum of the main peak at  $t_R$ . MALDI-TOF MS spectrum (C: full, D: zoom).

### 5.2 Peptide 1

H-KLPPGW~~EX~~S-~~AD~~GRVYYFNHITNASQWERPSG-OH

Chemical Formula: C<sub>175</sub>H<sub>259</sub>N<sub>51</sub>O<sub>49</sub>, molar mass: 3861.3 g/mol, exact mass: 3858.9 Da

Peptide **1(CSY)** (250 nmol) was CSY-deprotected with method (b). Unprotected peptide **1** was obtained as a colorless powder (112.2 nmol, 45%).

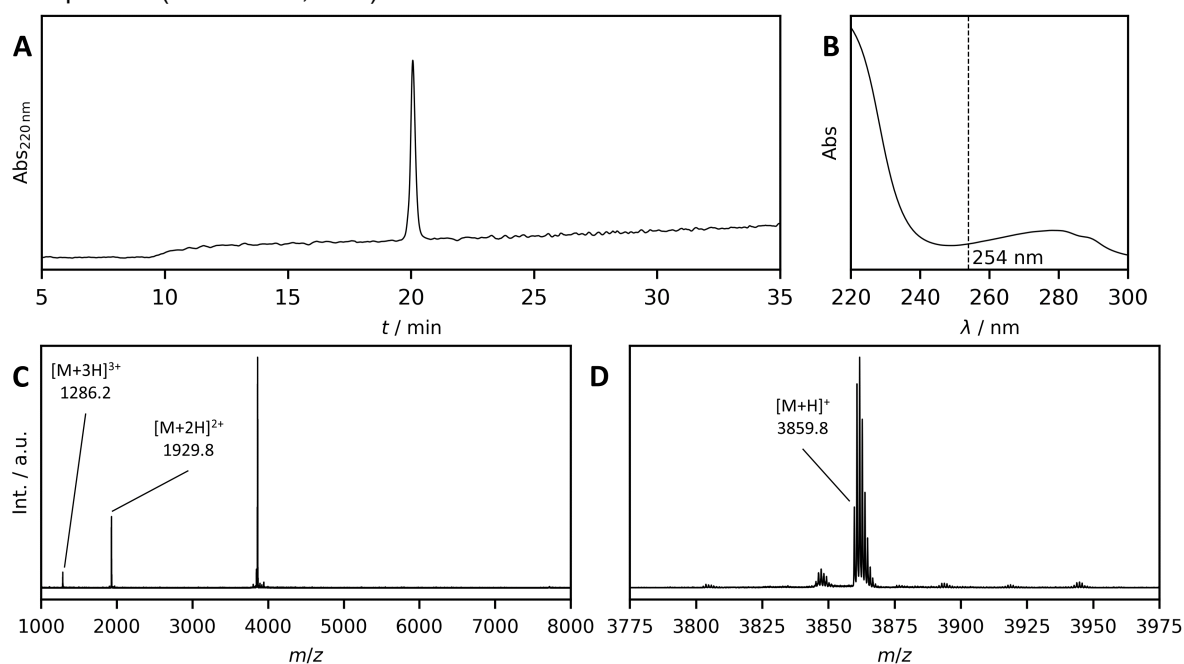

Figure S9: Analytical data for **1**. A: analytical HPLC trace  $t_R = 20.1$  min. B: UV/Vis spectrum of the main peak at  $t_R$ . MALDI-TOF MS spectrum (C: full, D: zoom).

### 5.3 Peptide 2(CSY)

Ac-GLPPSWYKVF**D(CSY)**PSSGLPYYWNAD**(CSY)**TD**(CSY)**LVSWLSPHD**(CSY)**-NH<sub>2</sub>

Chemical formula: C<sub>204</sub>H<sub>276</sub>N<sub>46</sub>O<sub>49</sub>S<sub>4</sub>, molecular mass: 4285.0 g/mol, exact mass: 4281.9 Da

After final cleavage the crude product was obtained as a yellowish powder (157.1 mg). A part of it (41.0 mg) was purified by HPLC and after freeze-drying a colorless powder (11.2 mg, 2.61 μmol, 27%) was obtained.

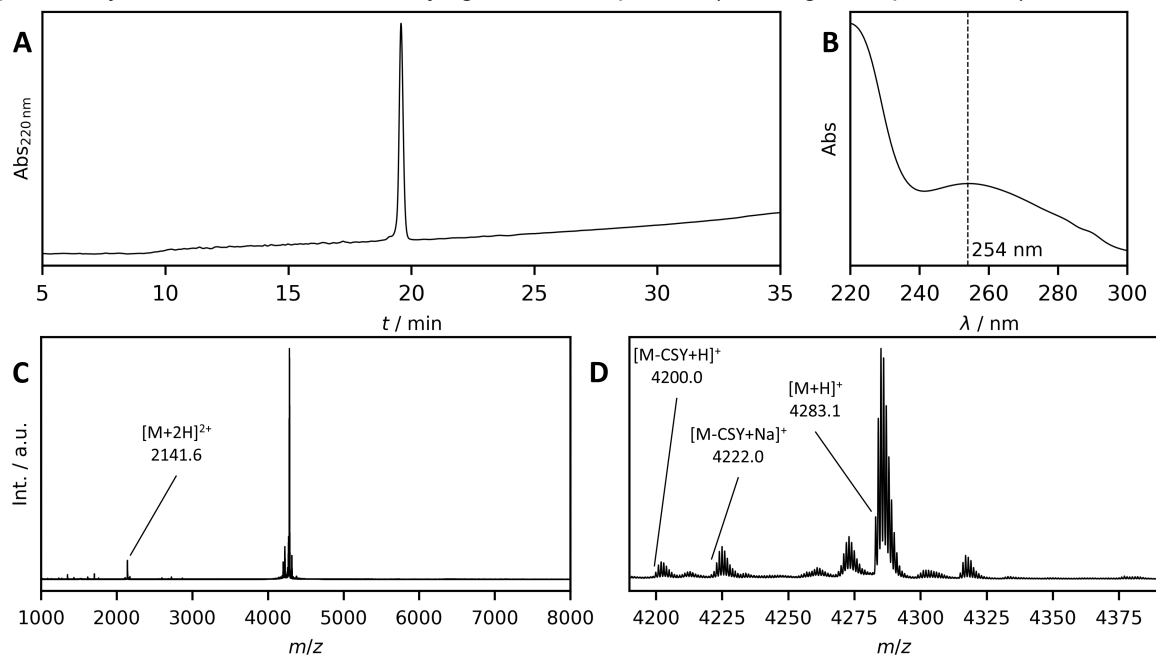

Figure S10: Analytical data for **2(CSY)**. A: analytical HPLC trace  $t_R = 19.6$  min. B: UV/Vis spectrum of the main peak at  $t_R$ . MALDI-TOF MS spectrum (C: full, D: zoom).

### 5.4 Peptide 2

Ac-GLPPSWYKVF**DPSS**GLPYYWNAD**DTDL**VSWLSPHD-NH<sub>2</sub>

Chemical formula: C<sub>188</sub>H<sub>256</sub>N<sub>42</sub>O<sub>53</sub>, molecular mass: 3952.4 g/mol, exact mass: 3949.9 Da

Peptide **2(CSY)** (250 nmol) was CSY-deprotected with method (c). Unprotected peptide **2** was obtained as a colorless powder (41.5 nmol, 17%).

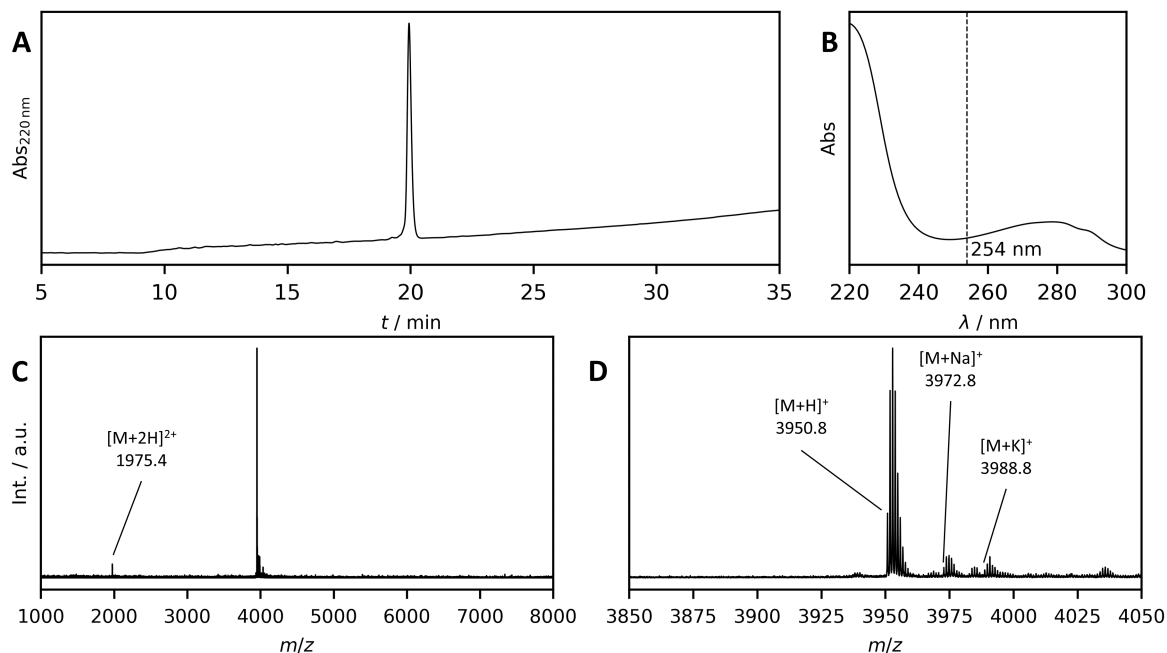

Figure S11: Analytical data for **2**. A: analytical HPLC trace  $t_R = 19.9$  min. B: UV/Vis spectrum of the main peak at  $t_R$ . MALDI-TOF MS spectrum (C: full, D: zoom).

## 5.5 Peptide 3(CSY)

Ac-AEYVRALF**D**(CSY)FNGND(CSY)EED(CSY)LPFKKGD(CSY)ILRIRD(CSY)KPEEQWWNAED(CSY)SEGKRGXIPVPYVEKY-NH<sub>2</sub>

Chemical formula: C<sub>334</sub>H<sub>493</sub>N<sub>87</sub>O<sub>88</sub>S<sub>6</sub>, molecular mass: 7327.5 g/mol, exact mass: 7322.5 Da

After final cleavage and precipitation from diethyl ether the crude product was obtained as a yellowish powder (155.3 mg). A part of it (76.2 mg) was purified by HPLC and after freeze-drying a colorless powder (14.2 mg, 1.94 μmol, 19%) was obtained.

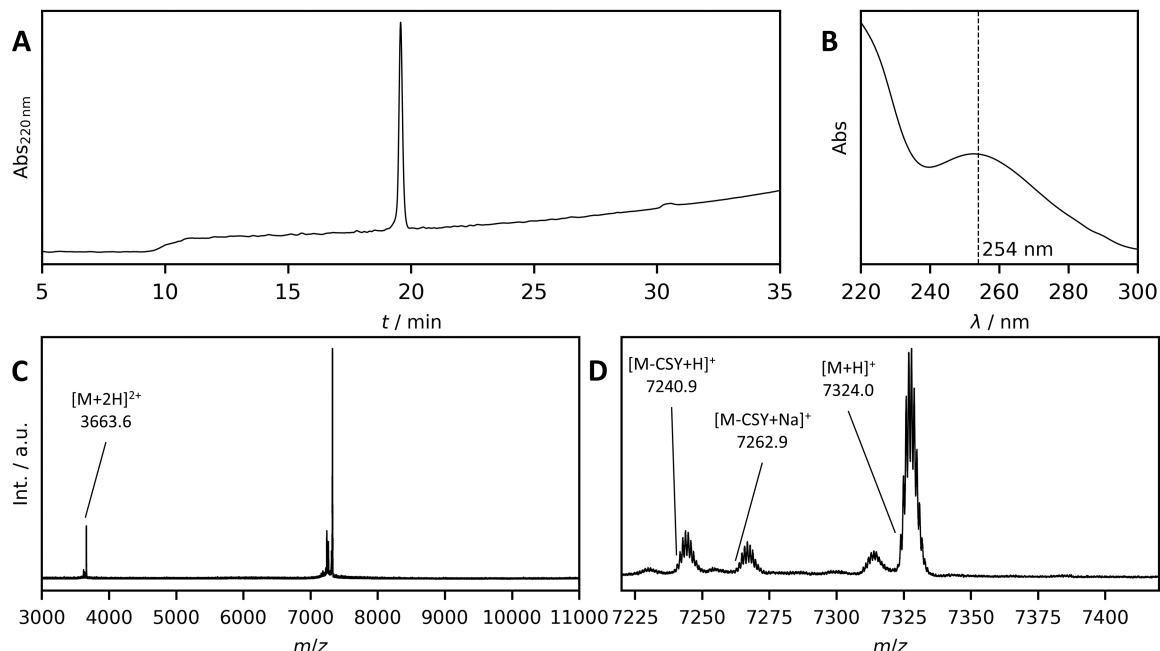

Figure S12: Analytical data for **3(CSY)**. A: analytical HPLC chromatogram  $t_R = 19.6$  min. B: UV/Vis spectrum of the main peak at  $t_R$ . MALDI-TOF MS spectrum (C: full, D: zoom).

## 5.6 Peptide 3

Ac-AEYVRALF**D**FNGND**EED**DLPFKKGDILRIR**D**KPEEQWWNA**E**SEGKRGXIPVPYVEKY-NH<sub>2</sub>

Chemical formula: C<sub>310</sub>H<sub>463</sub>N<sub>81</sub>O<sub>94</sub>, molecular mass: 6828.6 g/mol, exact mass: 6824.4 Da

Peptide **3(CSY)** (250 nmol) was CSY-deprotected with method (b). Unprotected peptide **3** was obtained as a colorless powder (101.4 nmol, 41%).

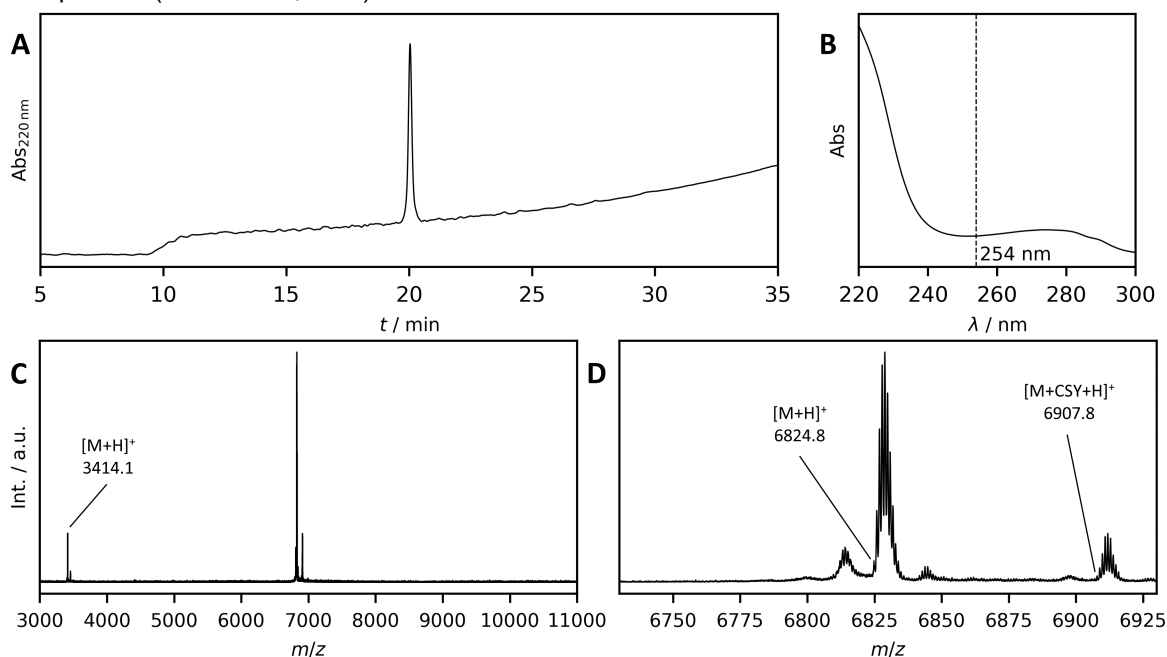

Figure S13: Analytical data for **3**. A: analytical HPLC trace  $t_R = 20.0$  min. B: UV/Vis spectrum of the main peak at  $t_R$ . MALDI-TOF MS spectrum (C: full, D: zoom). Traces of partially CSY-protected **3** were detected in the

MS spectrum. Positively charged CSY flies extremely well in MALDI-TOF. No CSY-protected species were found in the UV/Vis spectrum and HPLC.



## 6 Additional Spectra

### 6.1 NMR

#### 6.1.1 Fmoc-Asp(CSY)-OtBu

$^1\text{H}$ -NMR (600 MHz, DMSO- $d_6$ )

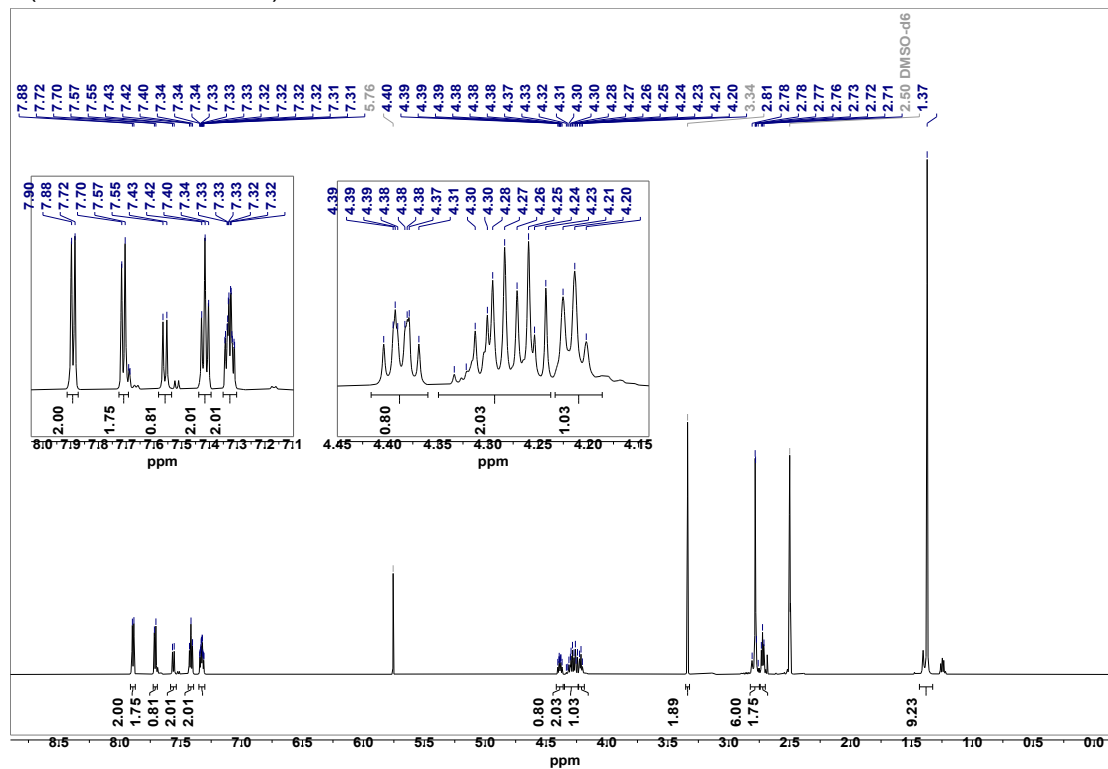

$^{13}\text{C}$ -NMR (151 MHz, DMSO- $d_6$ )

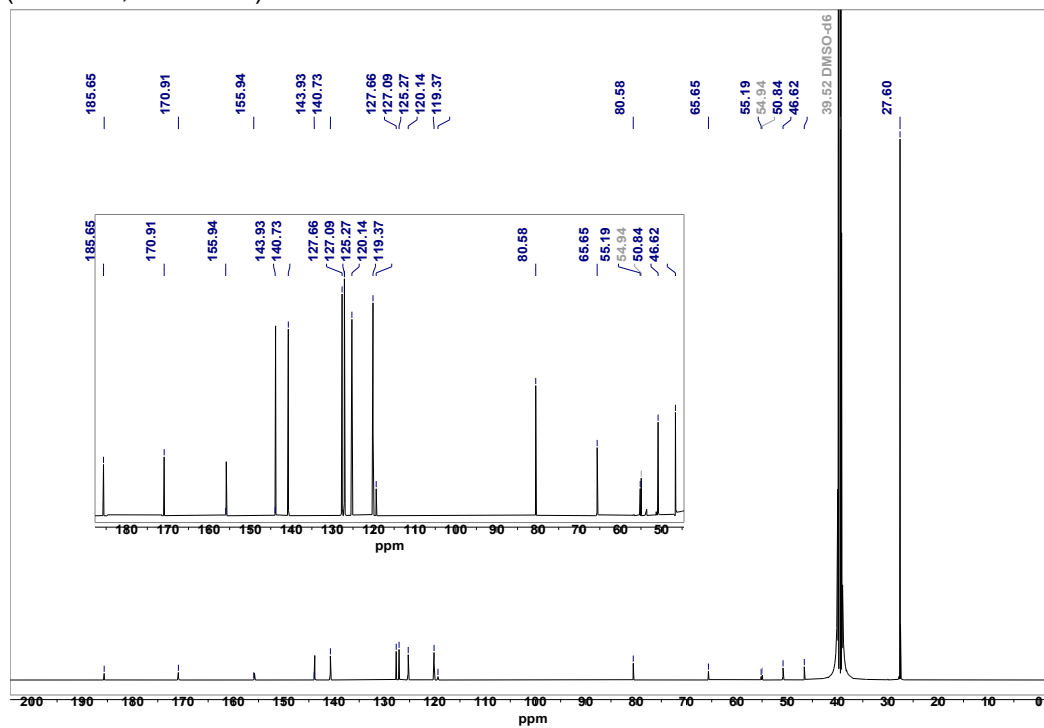

$^1\text{H}$ - $^1\text{H}$  COSY (600 MHz, 600 MHz, DMSO- $\text{d}_6$ )

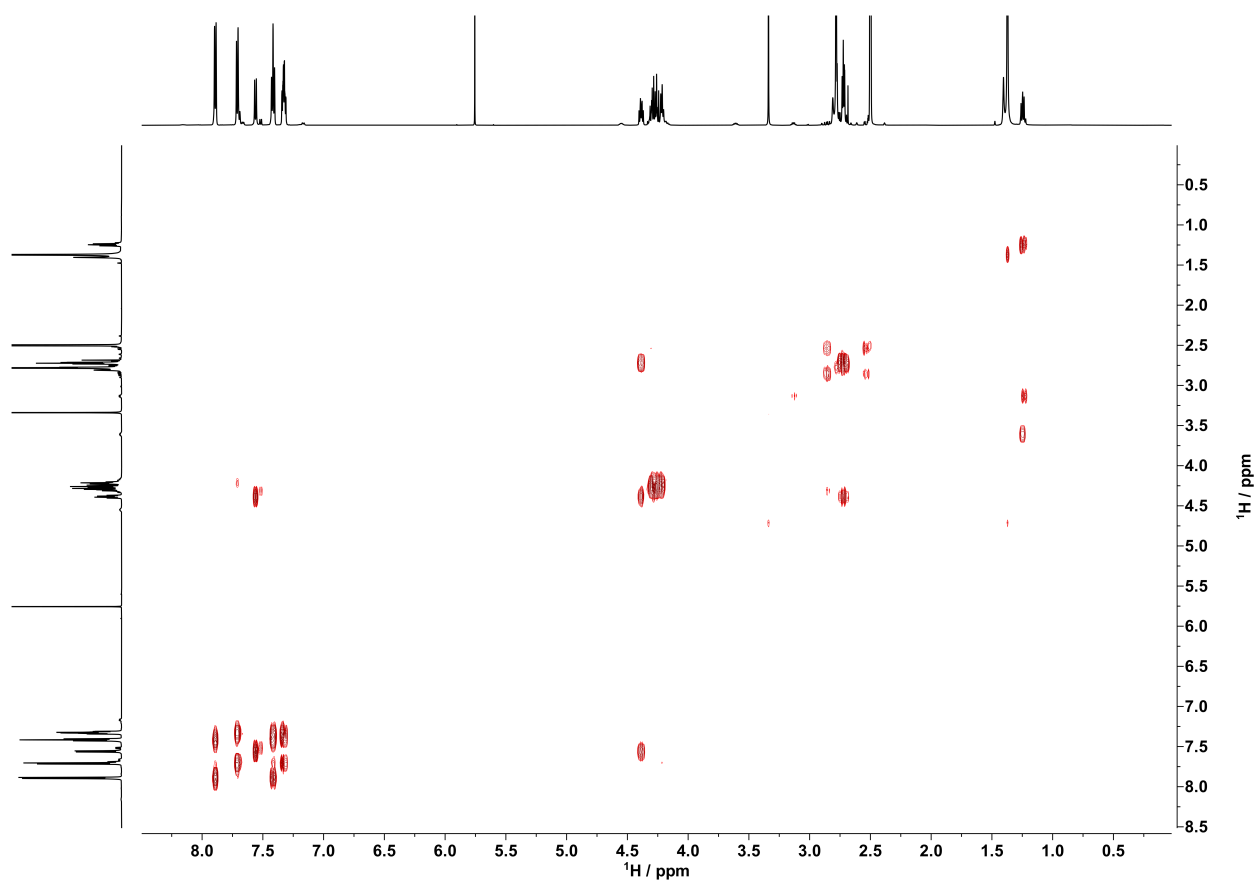

$^1\text{H}$ - $^{13}\text{C}$  HSQC (600 MHz, 151 MHz, DMSO- $\text{d}_6$ )

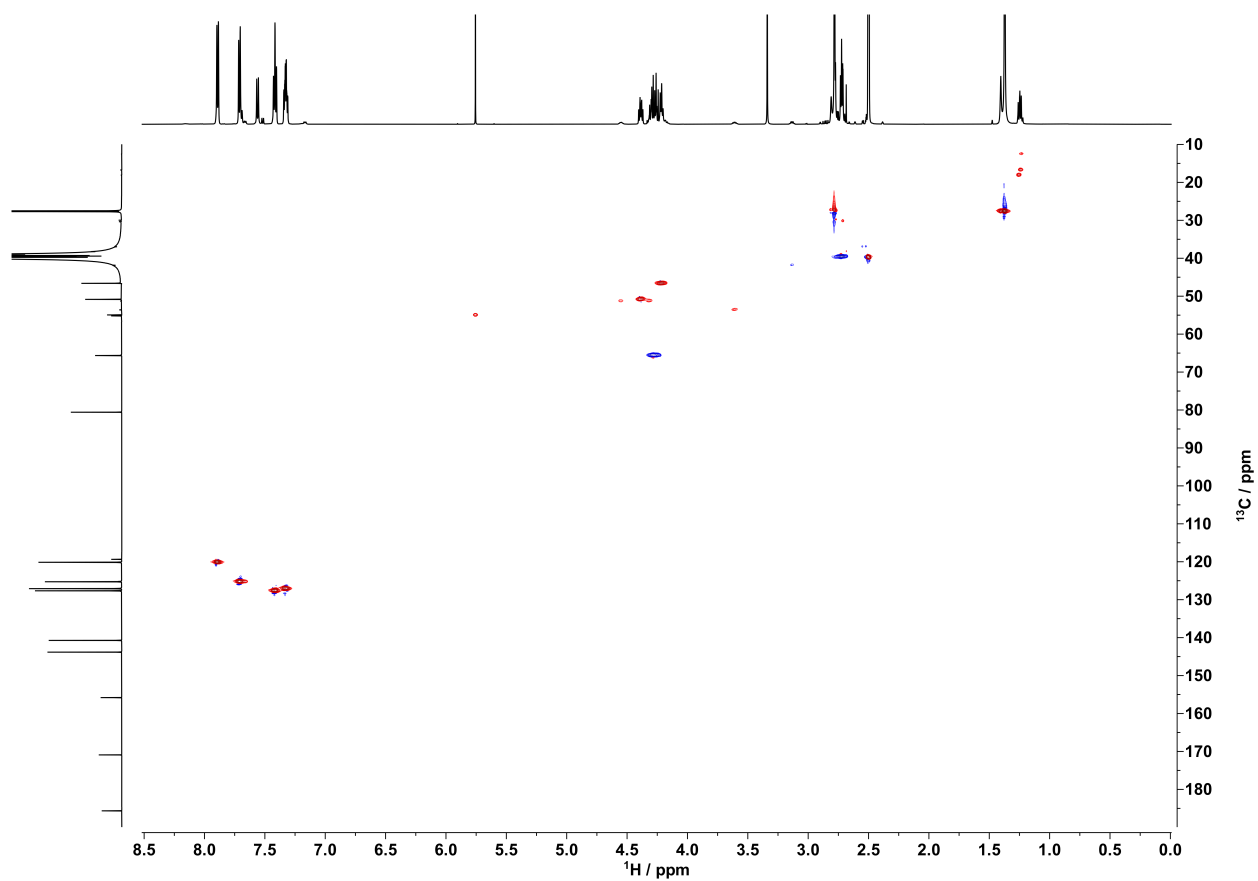

## 6.1.2 Fmoc-Asp(CSY)-OH

$^1\text{H-NMR}$  (400 MHz,  $\text{DMSO-d}_6$ )

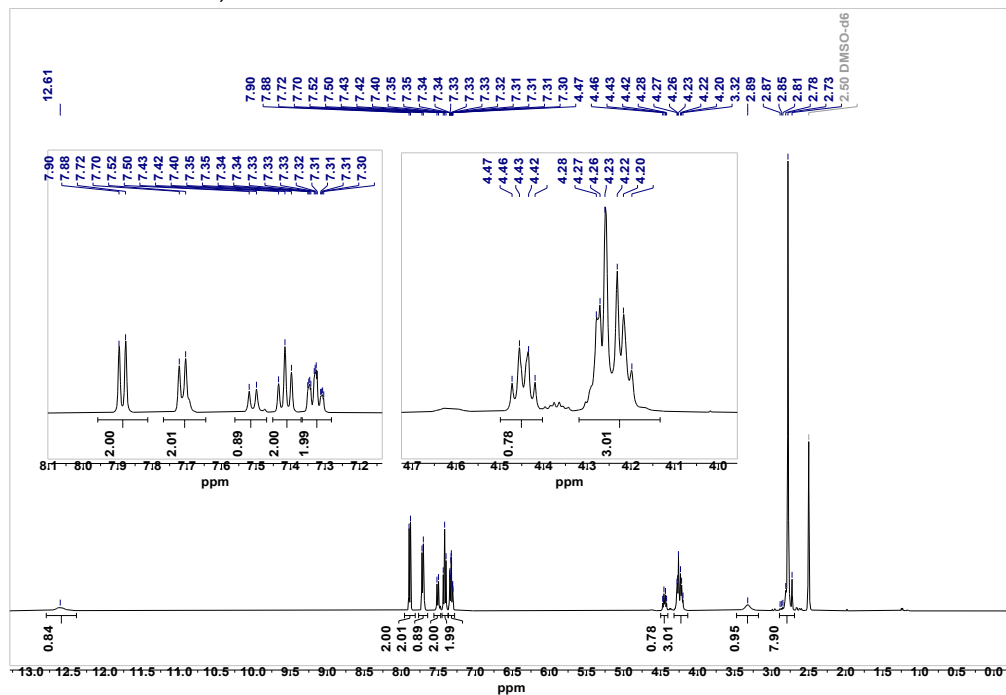

$^{13}\text{C-NMR}$  (101 MHz,  $\text{DMSO-d}_6$ )

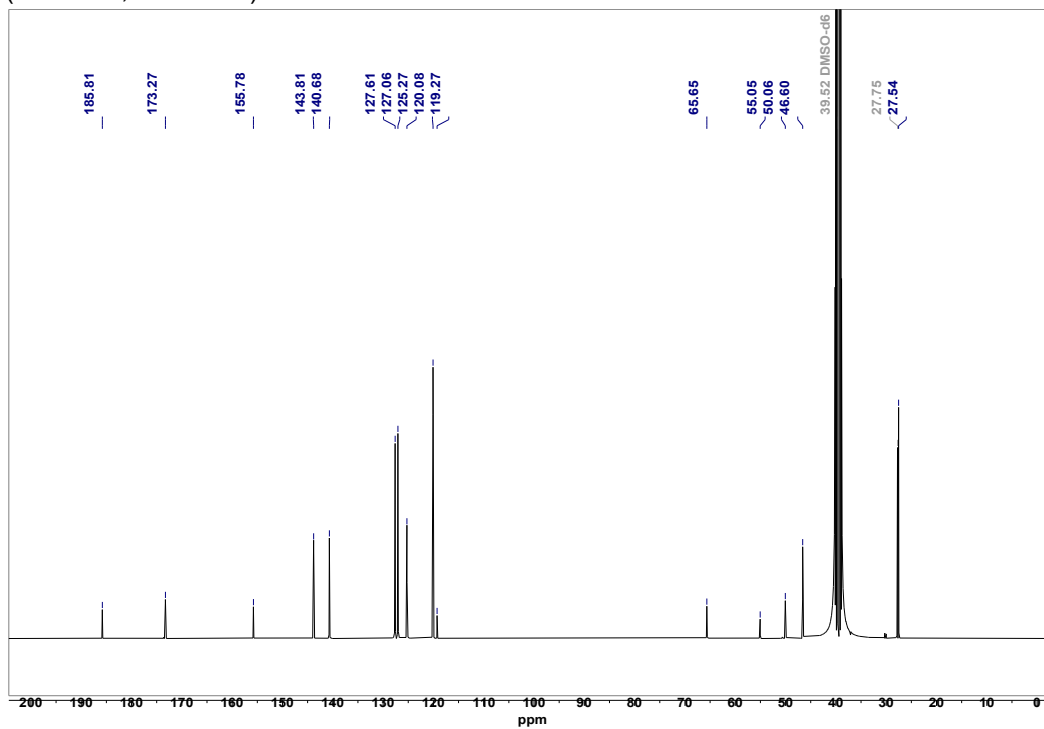

$^1\text{H}, ^1\text{H}$  COSY (400 MHz, 400 MHz, DMSO- $\text{d}_6$ )

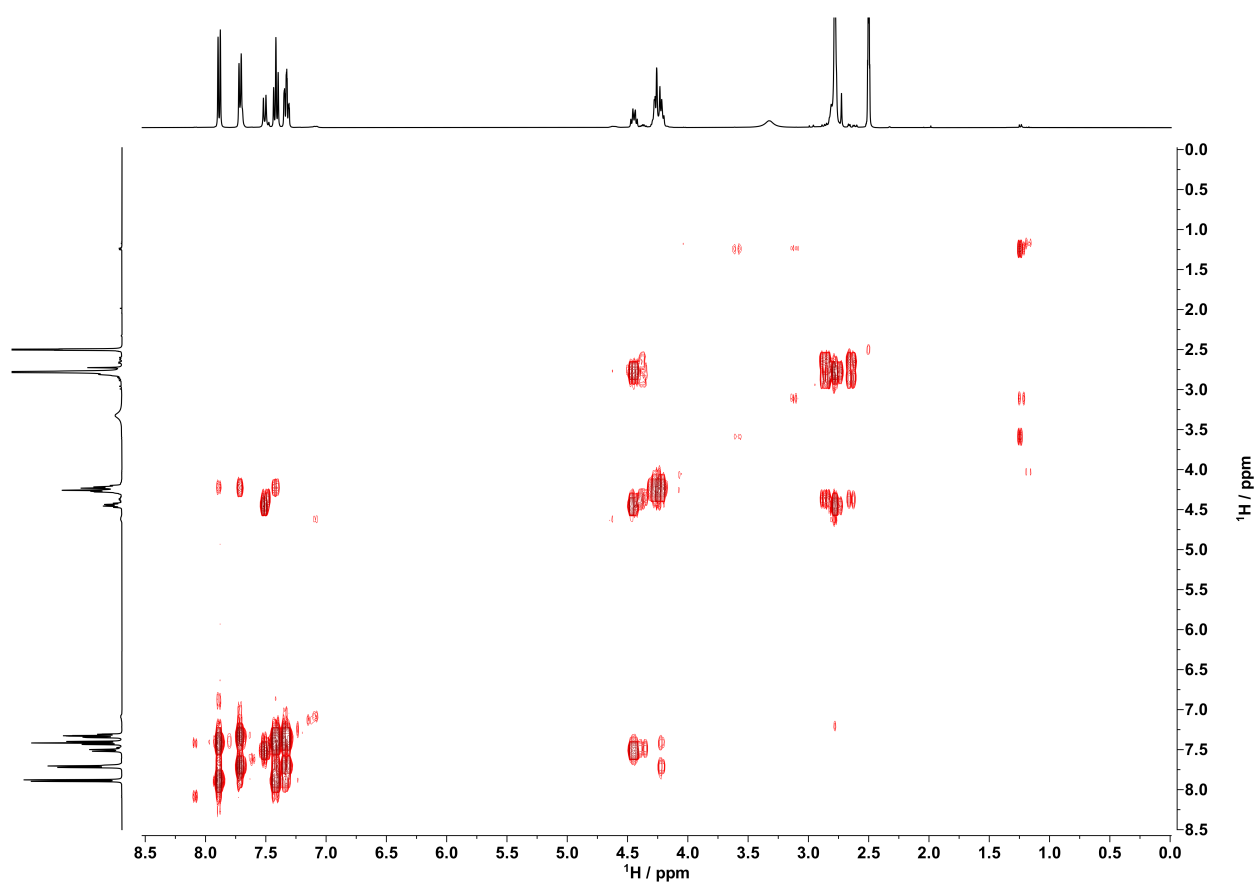

$^1\text{H}, ^{13}\text{C}$  HSQC (400 MHz, 101 MHz, DMSO- $\text{d}_6$ )

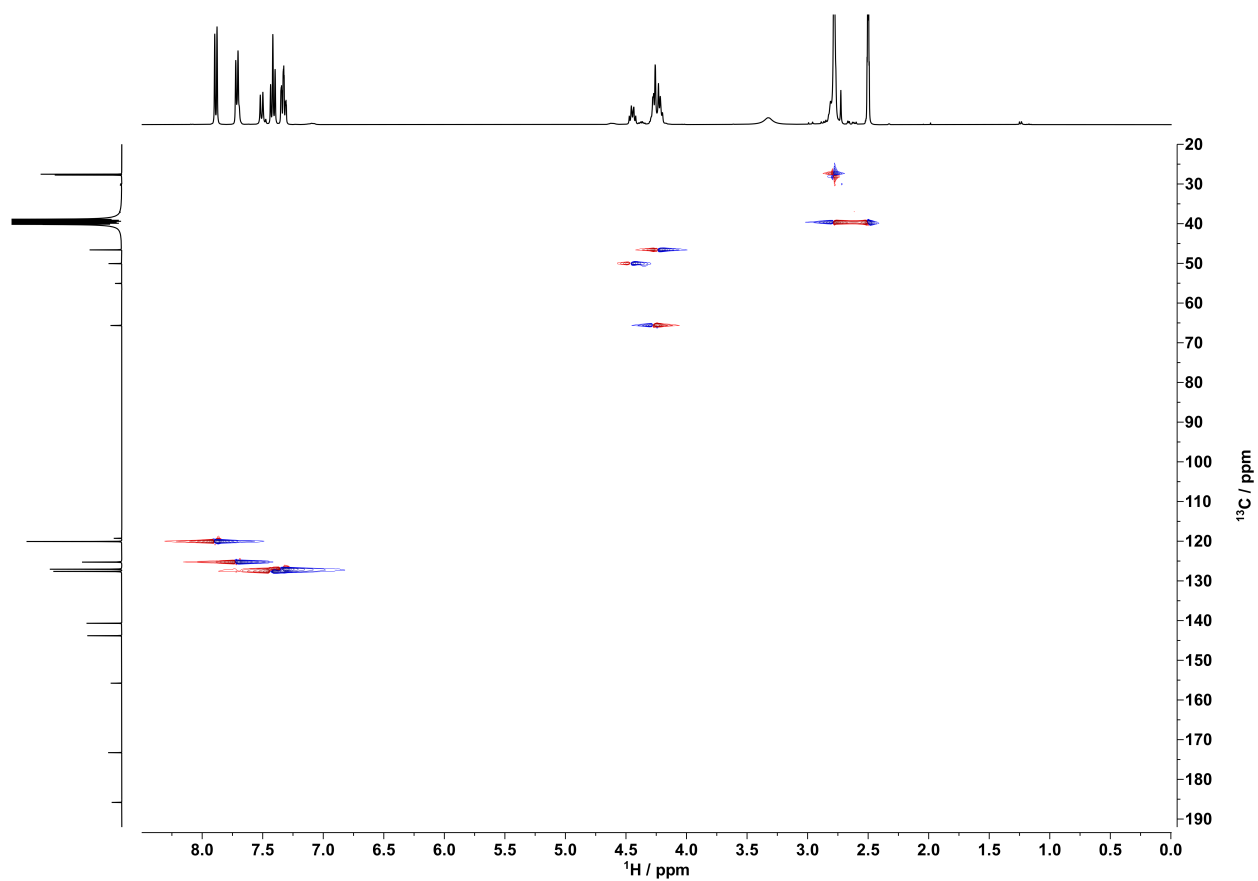

## 6.2 FT-IR

### 6.2.1 Fmoc-Asp(CSY)-OtBu

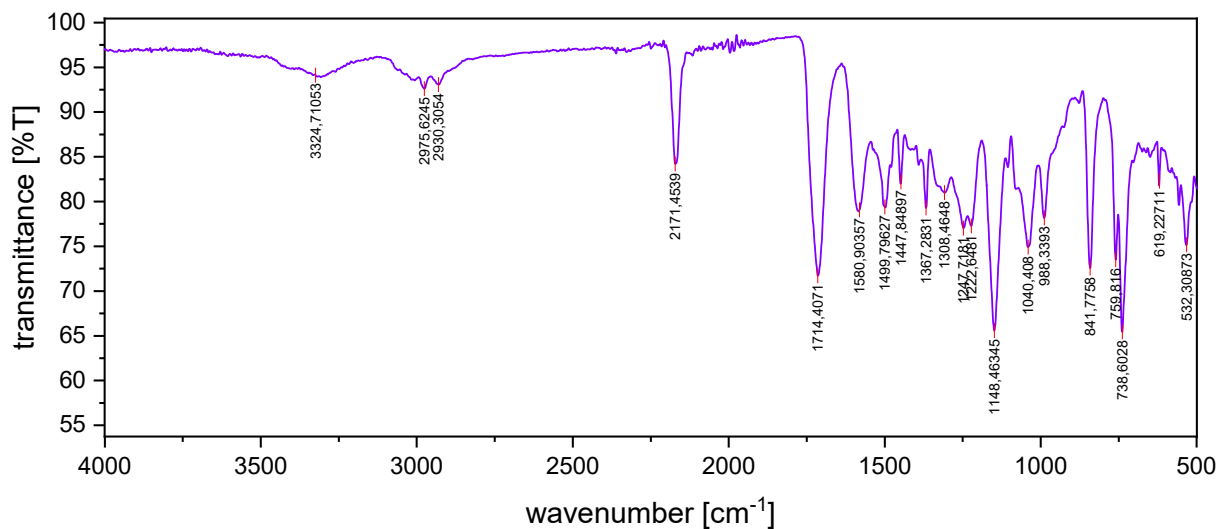

### 6.2.2 Fmoc-Asp(CSY)-OH

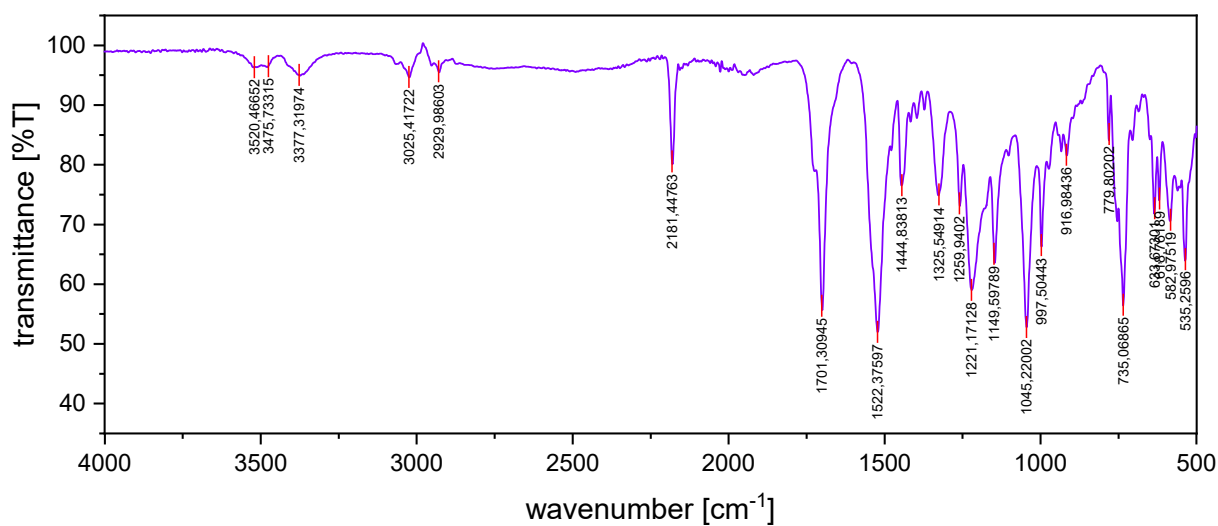

## 6.3 ESI-MS

### 6.3.1 Fmoc-Asp(CSY)-OtBu

## Mass Spectrum Formula Report

#### Analysis Info

Analysis Name D:\Data\Thomas\icr42367\_000002.d

Acquisition Date 4/23/2021 8:37:47 AM

Comment Pham, AK Thomas: D(CSg)1 in DCM/MeOH

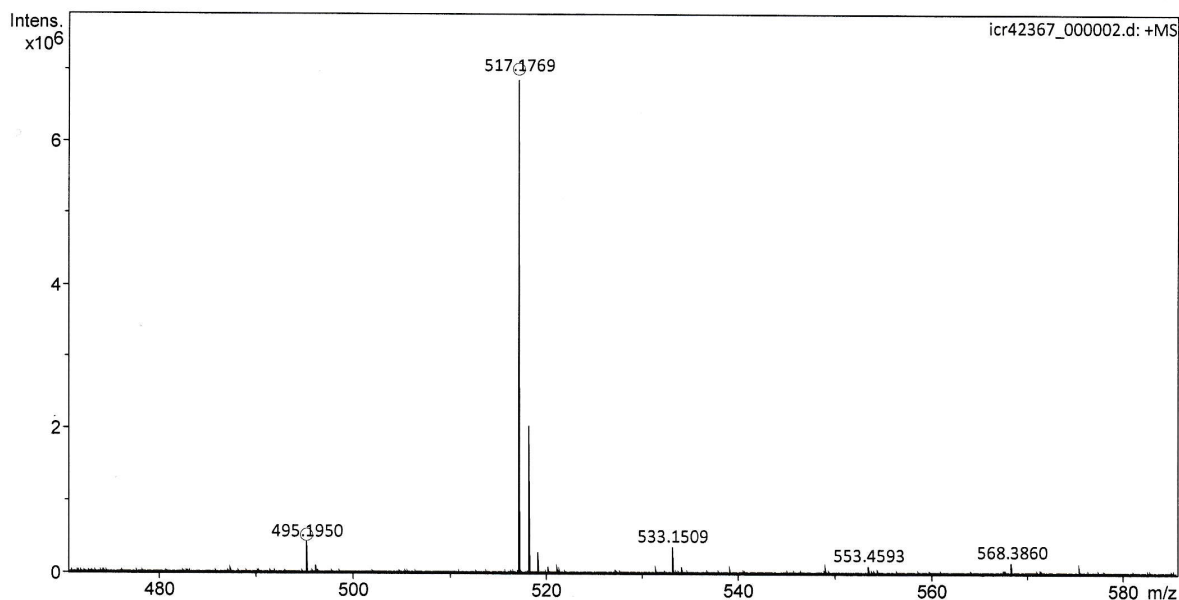

| Meas. m/z | Ion Formula   | m/z      | err [ppm] | mSigma | rdb  | e <sup>-</sup> Conf | N-Rule |
|-----------|---------------|----------|-----------|--------|------|---------------------|--------|
| 495.1950  | C21H29N5O9    | 495.1960 | 2.0       | 19.2   | 10.0 | odd                 | ok     |
|           | C20H33NO13    | 495.1946 | -0.7      | 23.7   | 5.0  | odd                 | ok     |
|           | C19H27N8O8    | 495.1946 | -0.7      | 26.6   | 10.5 | even                | ok     |
|           | C20H23N12O4   | 495.1960 | 2.0       | 27.0   | 15.5 | even                | ok     |
|           | C26H25N9S     | 495.1948 | -0.3      | 29.1   | 19.0 | odd                 | ok     |
|           | C27H31N2O5S   | 495.1948 | -0.3      | 29.9   | 13.5 | even                | ok     |
|           | C18H21N15O3   | 495.1946 | -0.7      | 38.9   | 16.0 | odd                 | ok     |
|           | C33H25N3O2    | 495.1941 | -1.7      | 52.1   | 23.0 | odd                 | ok     |
|           | C35H27O3      | 495.1955 | 1.0       | 71.1   | 22.5 | even                | ok     |
|           | C27H30N2NaO5S | 517.1768 | -0.3      | 7.1    | 13.5 | even                | ok     |
|           | C26H31NO8S    | 517.1765 | -0.9      | 8.9    | 12.0 | odd                 | ok     |
|           | C27H27N5O4S   | 517.1778 | 1.7       | 10.5   | 17.0 | odd                 | ok     |
|           | C26H24N9NaS   | 517.1768 | -0.3      | 16.4   | 19.0 | odd                 | ok     |
|           | C25H25N8O3S   | 517.1765 | -0.9      | 16.6   | 17.5 | even                | ok     |
| 517.1769  | C21H28N5NaO9  | 517.1779 | 1.9       | 28.3   | 10.0 | odd                 | ok     |
|           | C33H24N3NaO2  | 517.1761 | -1.7      | 30.4   | 23.0 | odd                 | ok     |
|           | C33H21N6O     | 517.1771 | 0.4       | 31.4   | 26.5 | even                | ok     |
|           | C20H29N4O12   | 517.1776 | 1.4       | 32.4   | 8.5  | even                | ok     |
|           | C20H32NNaO13  | 517.1766 | -0.7      | 35.0   | 5.0  | odd                 | ok     |
|           | C20H22N12NaO4 | 517.1779 | 1.9       | 39.5   | 15.5 | even                | ok     |
|           | C35H26NaO3    | 517.1774 | 0.9       | 46.4   | 22.5 | even                | ok     |
|           |               |          |           |        |      |                     |        |
|           |               |          |           |        |      |                     |        |
|           |               |          |           |        |      |                     |        |

## 6.3.2 Fmoc-Asp(CSY)-OH

## Mass Spectrum Formula Report

## Analysis Info

Analysis Name D:\Data\Thomas\lcr42414\_000001.d

Acquisition Date 4/28/2021 8:15:38 AM

Comment Zilke, AK Thomas: N-Fmoc-Asp(CSY)-OH in DCM/MeOH

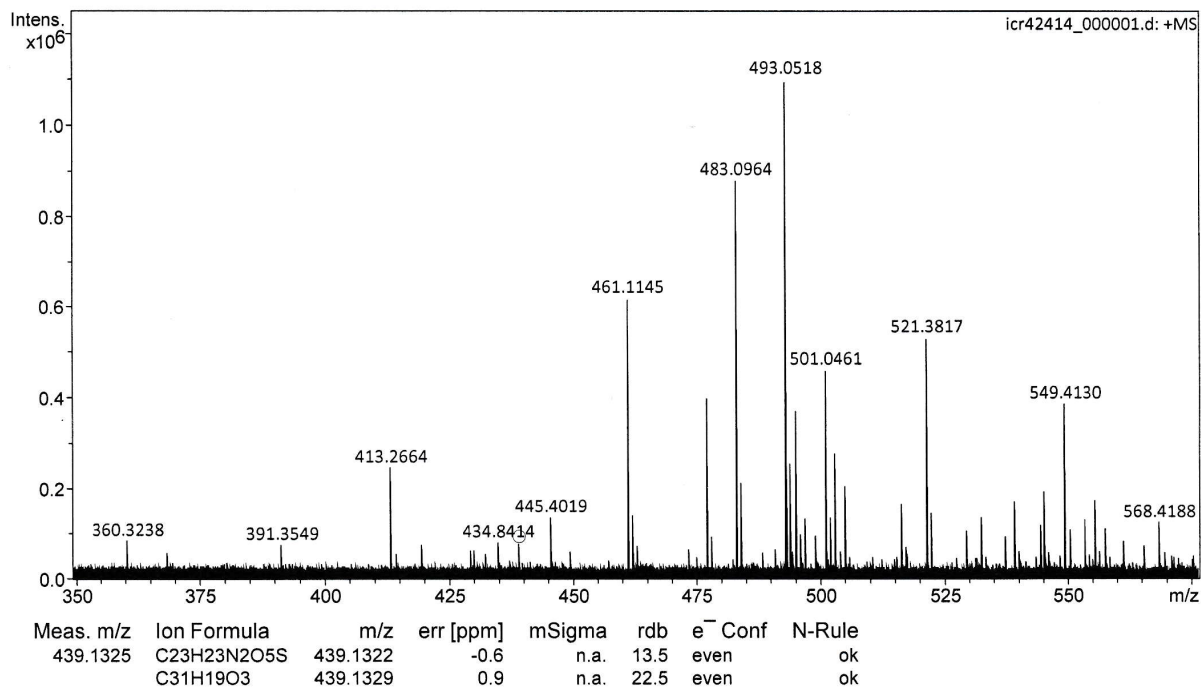

## 7 Abbreviation

|         |                                       |
|---------|---------------------------------------|
| CSY     | Cyanosulfurylide                      |
| DBU     | 1,8-Diazabicyclo[5.4.0]undec-7-ene    |
| DIC     | <i>N,N'</i> -Diisopropylcarbodiimide  |
| DIPEA   | <i>N,N</i> -Diisopropylethylamine     |
| DMF     | <i>N,N</i> -Dimethylformamide         |
| DMSO    | Dimethyl sulfoxide                    |
| Gdn HCl | Guanidine hydrochloride               |
| HFIP    | 1,1,1,3,3,3-Hexafluoroisopropanol     |
| mCPBA   | <i>meta</i> -Chloroperoxybenzoic acid |
| NCS     | <i>N</i> -Chlorosuccinimide           |
| Oxone   | Potassium peroxymonosulfate           |
| TFE     | 2,2,2-Trifluoroethanol                |
| TIPS    | Triisopropyl silane                   |

## 8 Literature

1. K. Neumann, J. Farnung, S. Baldauf and J. W. Bode, *Nat. Commun.*, 2020, **11**, 982.
2. C. N. Pace, F. Vajdos, L. Fee, G. Grimsley and T. Gray, *Protein Sci.*, 1995, **4**, 2411-2423.
3. N. J. Greenfield, *Nat. Protoc.*, 2006, **1**, 2876-2890.
4. N. J. Greenfield, *Nat. Protoc.*, 2006, **1**, 2527-2535.
